# Supplementary material for: How to Keep the Balance between Red and Processed Meat Intake and Physical Activity Regarding Mortality: A Dose-Response Meta-Analysis
Source: MDPI journal article supplement (doi:10.3390/nu15153373), 2023-07-29
Supplement: s1 [file s1]

## **Supplementary Materials**

**How to keep the balance between red or processed meat intake and physical activity on mortality: a dose-response meta-analysis**

|                                                                                                                                                                                       |           |
|---------------------------------------------------------------------------------------------------------------------------------------------------------------------------------------|-----------|
| <b>Content</b> .....                                                                                                                                                                  | <b>3</b>  |
| <b>Supplementary Results</b> .....                                                                                                                                                    | <b>5</b>  |
| Characteristics of included studies .....                                                                                                                                             | 5         |
| Meta-analysis on red and processed meat intake and mortality risk .....                                                                                                               | 5         |
| Meta-analysis on muscle-strengthening activities and mortality risk.....                                                                                                              | 6         |
| Meta-analysis on daily steps and all-cause mortality .....                                                                                                                            | 7         |
| Supplementary References .....                                                                                                                                                        | 7         |
| <b>Supplementary Tables</b> .....                                                                                                                                                     | <b>11</b> |
| <b>Supplementary Table S1:</b> Medical subject headings (MeSH) and non-MeSH keywords<br>used to search relevant publications.....                                                     | 11        |
| <b>Supplementary Table S2:</b> Characteristics of included studies for association between<br>meat intake and mortality from cardiovascular disease and cancer .....                  | 12        |
| <b>Supplementary Table S3:</b> Characteristics of included studies for association between<br>muscle-strengthening activity and mortality from cardiovascular disease and cancer..... | 20        |
| <b>Supplementary Table S4:</b> Results of risk of bias assessment based on the Newcastle-<br>Ottawa scale .....                                                                       | 24        |
| <b>Supplementary Table S5:</b> Association of meat intake, daily steps and muscle-<br>strengthening activity for different subgroups.....                                             | 28        |
| <b>Supplementary Table S6:</b> The balanced relationship between meat intake and physical<br>activity (all-cause mortality).....                                                      | 33        |
| <b>Supplementary Table S7:</b> The balanced relationship between meat intake and physical<br>activity (cardiovascular disease mortality) .....                                        | 34        |
| <b>Supplementary Table S8:</b> The balanced relationship between meat intake and physical<br>activity (cancer mortality) .....                                                        | 35        |
| <b>Supplementary Table S9:</b> The balanced relationship between meat intake and physical<br>activity .....                                                                           | 36        |
| <b>Supplementary Table S10:</b> The pooled estimates of red and processed meat, physical<br>activity and all-cause, cardiovascular disease and cancer mortality.....                  | 38        |
| <b>Supplementary Table S11:</b> PRISMA Checklist of the systematic review and meta-<br>analysis .....                                                                                 | 40        |
| <b>Supplementary Table S12:</b> PRISMA Abstracts Checklist of the systematic review and<br>meta-analysis .....                                                                        | 43        |

|                                                                                                                                                                                                           |           |
|-----------------------------------------------------------------------------------------------------------------------------------------------------------------------------------------------------------|-----------|
| <b>Supplementary Table S13: Number of studies from different databases.....</b>                                                                                                                           | <b>44</b> |
| <b>Supplementary Figures .....</b>                                                                                                                                                                        | <b>46</b> |
| <b>Supplementary Figure S1: Forest plots of meta-analyses of red and processed meat intake and mortality risk.....</b>                                                                                    | <b>46</b> |
| <b>Supplementary Figure S2: Forest plots of meta-analyses of mixed intake of red and processed meat and mortality risk .....</b>                                                                          | <b>47</b> |
| <b>Supplementary Figure S3: Forest plots of meta-analyses of muscle-strengthening activity (MSA) and mortality outcomes .....</b>                                                                         | <b>48</b> |
| <b>Supplementary Figure S4: Linear and non-linear dose-response relationships between red and processed meat intake and mortality risk.....</b>                                                           | <b>49</b> |
| <b>Supplementary Figure S5: Non-linear dose-response relationships between MSA and mortality risk .....</b>                                                                                               | <b>50</b> |
| <b>Supplementary Figure S6: Linear dose-response relationships between daily steps all-cause mortality .....</b>                                                                                          | <b>51</b> |
| <b>Supplementary Figure S7: Balanced associations between mixed intake of red and processed meat and muscle-strengthening activity .....</b>                                                              | <b>52</b> |
| <b>Supplementary Figure S8: Balanced associations between mixed intake red and processed meat, daily steps and all-cause mortality .....</b>                                                              | <b>53</b> |
| <b>Supplementary Figure S9: Sensitivity analysis of mixed red and processed intake and mortality outcomes .....</b>                                                                                       | <b>54</b> |
| <b>Supplementary Figure S10: Sensitivity analysis of red meat intake and mortality outcomes.....</b>                                                                                                      | <b>55</b> |
| <b>Supplementary Figure S11: Sensitivity analysis of processed intake and mortality outcomes .....</b>                                                                                                    | <b>56</b> |
| <b>Supplementary Figure S12: Sensitivity analysis of muscle-strengthening activity (MSA) and mortality outcomes .....</b>                                                                                 | <b>57</b> |
| <b>Supplementary Figure S13: Sensitivity analysis of daily steps and all-cause mortality ..</b>                                                                                                           | <b>58</b> |
| <b>Supplementary Figure S14: Funnel plot of included studies in the meta-analysis of the intake of mixed red and processed meat and mortality from all-cause, cardiovascular disease and cancer .....</b> | <b>59</b> |

|                                                                                                                                                                                             |    |
|---------------------------------------------------------------------------------------------------------------------------------------------------------------------------------------------|----|
| <b>Supplementary Figure S15:</b> Funnel plot of included studies in the meta-analysis of the intake of red meat and mortality from all-cause, cardiovascular disease, and cancer .....      | 60 |
| <b>Supplementary Figure S16:</b> Funnel plot of included studies in the meta-analysis of the intake of processed meat and mortality from all-cause, cardiovascular disease, and cancer..... | 61 |
| <b>Supplementary Figure S17:</b> Funnel plot of included studies in the meta-analysis of daily steps and all-cause mortality .....                                                          | 61 |

## **Supplementary Results**

### **Characteristics of included studies**

All studies were published between 1999 and 2021 and had a prospective cohort design. Most studies (26/57) were conducted in the USA. Other studies came from countries and regions including the Netherlands (1), Denmark (1), China (1), the UK (6), Australia (3), Norway (1), Iran (1), Japan (3), Spain (2), Sweden (1), Asia (1), European (1) and 21 countries (1). The maximum follow-up is 30 years and participants' age ranged from 18 to 92. All studies except for eight[1-8] adjusted for age. Most cohorts controlled for some conventional risk factors, including sex (in n=28 studies), smoking (n=38), and alcohol consumption (n=35). Others also adjusted for race/ethnicity (n=19), education (n=29), body mass index (n=33), and marital status (n=11). To examine meat intake, 26 studies used a food frequency questionnaire and one publication used dietary records. To measure step counts per day, seven studies used an accelerometer and three studies used a pedometer, one study used a questionnaire to record walking time. Eight studies used questionnaire to measure MSAs and one study used self-reporting methods.

### **Meta-analysis on red and processed meat intake and mortality risk**

Of 27 studies included 5,893,740 participants and 435,880 deaths on the intake of red meat and processed meat and mortality[1-5, 9-30] risk, 21 studies with 3,317,459 participants and 426,936 deaths presented sufficient data for the comparison of the highest versus lowest categories of red and processed meat intake and all-cause mortality[1-5, 9-16, 18, 20, 21, 25-27, 29, 30], 16 of CVD mortality included 2,616,909 participants and 250,719 deaths[2-4, 9, 10, 13-16, 18, 20-22, 25-27], and 20 of cancer mortality included 4,898,161 participants and 382,793 deaths[2-4, 9-16, 18-21, 23-27].

The association between consumption of red meat and CVD mortality was examined in 13 papers, the summary effect size (pooled HR) comparing the highest and lowest intakes was (1.14; 95% CI 1.03 to 1.26), with significant heterogeneity ( $I^2=85\%$   $P < 0.01$ ) (Fig. S1) [2, 4, 9, 14-16, 18, 20-22, 25-27]. For red meat intake and cancer mortality, an analogous result (HR 1.07; 95% CI 1.01 to 1.13) (Fig. S1) was obtained based on 16 publications with significant heterogeneity ( $I^2=77\%$   $P < 0.01$ ) [2, 4, 9, 11, 12, 14-16, 18-21, 24-27]. No evidence of publication bias was detected (Egger's test,  $P=0.208$  for CVD

mortality,  $P=0.167$  for cancer mortality; Begg's test,  $P=0.596$  for CVD mortality,  $P=0.695$  for cancer mortality) (Table S10).

Of 10 papers[2, 4, 9, 14, 15, 18, 20, 21, 25, 27], significant associations between consumption of processed meat and CVD mortality were found (HR1.21; 95% CI 1.08 to 1.35) (Fig. S1) with significant heterogeneity ( $I^2=83\%$   $P < 0.01$ ). A similar result was obtained in cancer mortality, which was examined in 15 articles (HR1.11; 95% CI 1.09 to 1.14) (Fig. S1) [2, 4, 9, 11, 12, 14, 15, 17-21, 23, 25, 27]. Moreover, no significant heterogeneity among the studies was found ( $I^2=2\%$   $P=0.43$ ). No evidence of publication bias was detected (Egger's test,  $P=0.428$  for CVD mortality,  $P=0.759$  for cancer mortality; Begg's test,  $P=0.760$  for CVD mortality,  $P=0.675$  for cancer mortality) (Table S10).

The association between consumption of mixed red and processed meat and all-cause mortality was examined in ten papers[2, 3, 5, 9, 10, 12, 13, 18, 25, 29], the summary effect size was 1.22 (95% CI 1.15 to 1.30) (Fig. S2). Significant heterogeneity was seen between studies ( $I^2=86\%$ ,  $P<0.01$ ). Mixed consumption of red and processed meat, which was examined in eight studies was associated with increased mortality of CVD (HR 1.30; 95% CI 1.20 to 1.41) (Fig. S2)[2, 3, 9, 10, 13, 18, 25, 28], with moderate heterogeneity among the studies ( $I^2=67\%$   $P < 0.01$ ). Eight studies examined the association between mixed consumption of red and processed meat and cancer mortality (HR 1.15; 95% CI 1.12 to 1.19) (Fig. S2) with low heterogeneity ( $I^2=46\%$   $P=0.08$ ) [2, 3, 9, 10, 12, 13, 18, 25]. No evidence of publication bias was detected (Egger's test,  $P=0.85$  for all-cause mortality,  $P=0.485$  for CVD mortality; Begg's test,  $P=0.876$  for all-cause mortality,  $P=0.917$  for CVD mortality) and little evidence of publication bias was observed in the cancer mortality analysis ( $P=0.159$  in Egger's test,  $P=0.037$  in Begg's test) (Table S10).

### **Meta-analysis on muscle-strengthening activities and mortality risk**

Among the 9 studies included a total of 1,023,245 participants and 103,211 deaths investigating MSAs and mortality[31-39], 8 studies with 712,617 participants and 95,936 deaths provided enough data for comparison of the highest and lowest categories of MSAs with mortality from all causes[31-36, 38, 39]; 7 studies with 685,890 participants and 90,981 deaths for CVD mortality[31-35, 38, 39]; and 7 studies with 983,927 participants and 97,980 deaths for cancer mortality[31, 32, 34, 35, 37-39].

In studies on the relationship between MSA and CVD mortality, MSAs were associated with a 12% lower risk of CVD mortality (HR 0.88; 95% CI 0.81 to 0.95) (Fig. S3) with moderate heterogeneity among the studies ( $I^2=43\%$   $P=0.11$ ). Similar results were also observed in the relationship between MSA and cancer mortality (HR 0.85 (95% CI 0.76 to 0.94) (Fig. S3), evidence of moderate heterogeneity was found between studies ( $I^2=54\%$ ,  $P=0.04$ ). No evidence of publication bias was detected (Egger's test,  $P=0.380$  for CVD mortality,  $P=0.763$  for cancer mortality; Begg's test,  $P=1$  for CVD mortality,  $P=1$  for cancer mortality) (Table S11).

### Meta-analysis on daily steps and all-cause mortality

The data of 11 studies included a total of 173,041 participants and 46,159 deaths[6-8, 40-47], provided sufficient information to compare the highest and lowest categories of steps per day with death from all causes; however, there were not enough data to calculate mortality from CVD and cancer. Compared with the lowest categories of steps per day, the highest categories of steps per day were associated with a reduced risk of mortality in the overall sample.

### Supplementary References

1. Mejbourn, H., et al., *Dietary Intake of Red Meat, Processed Meat, and Poultry and Risk of Colorectal Cancer and All-Cause Mortality in the Context of Dietary Guideline Compliance*. Nutrients, 2020. **13**(1).
2. Sheehy, S., J.R. Palmer, and L. Rosenberg, *High Consumption of Red Meat Is Associated with Excess Mortality Among African-American Women*. J Nutr, 2020. **150**(12): p. 3249-3258.
3. Bellavia, A., F. Stilling, and A. Wolk, *High red meat intake and all-cause cardiovascular and cancer mortality: is the risk modified by fruit and vegetable intake?* Am J Clin Nutr, 2016. **104**(4): p. 1137-1143.
4. Rashmi Sinha, P.A.J.C., PhD; Barry I. Graubard, P D; and M. Michael F. Leitzmann, DrPH; Arthur Schatzkin, MD, DrPH, *Meat Intake and Mortality A Prospective Study of Over Half a Million People*. American Medical Association, 2009.
5. Dominguez, L.J., et al., *Should we recommend reductions in saturated fat intake or in red/processed meat consumption? The SUN prospective cohort study*. Clin Nutr, 2018. **37**(4): p. 1389-1398.
6. Yamamoto, N., et al., *Daily step count and all-cause mortality in a sample of Japanese elderly people: a cohort study*. BMC Public Health, 2018. **18**(1): p. 540.
7. Hansen, B.H., et al., *Step by step: Association of device-measured daily steps with all-cause mortality-A prospective cohort Study*. Scand J Med Sci Sports, 2020. **30**(9): p. 1705-1711.

8. Patel, A.V., et al., *Walking in Relation to Mortality in a Large Prospective Cohort of Older U.S. Adults*. Am J Prev Med, 2018. **54**(1): p. 10-19.
9. Alshahrani, S.M., et al., *Red and Processed Meat and Mortality in a Low Meat Intake Population*. Nutrients, 2019. **11**(3).
10. Argyridou, S., et al., *Relevance of physical function in the association of red and processed meat intake with all-cause, cardiovascular, and cancer mortality*. Nutr Metab Cardiovasc Dis, 2019. **29**(12): p. 1308-1315.
11. David Whiteman<sup>1</sup>, John Muir<sup>1</sup>, Lesley Jones<sup>1</sup>, Mike Murphy<sup>1</sup> and Tim Key<sup>2</sup>, *Dietary questions as determinants of mortality: the OXCHECK experience*. Public Health Nutrition, 1999.
12. Etemadi, A., et al., *Mortality from different causes associated with meat, heme iron, nitrates, and nitrites in the NIH-AARP Diet and Health Study: population based cohort study*. BMJ, 2017. **357**: p. j1957.
13. Farvid, M.S., et al., *Dietary Protein Sources and All-Cause and Cause-Specific Mortality: The Golestan Cohort Study in Iran*. Am J Prev Med, 2017. **52**(2): p. 237-248.
14. Iqbal, R., et al., *Associations of unprocessed and processed meat intake with mortality and cardiovascular disease in 21 countries [Prospective Urban Rural Epidemiology (PURE) Study]: a prospective cohort study*. Am J Clin Nutr, 2021. **114**(3): p. 1049-1058.
15. Kappeler, R., M. Eichholzer, and S. Rohrmann, *Meat consumption and diet quality and mortality in NHANES III*. Eur J Clin Nutr, 2013. **67**(6): p. 598-606.
16. Lee, J.E., et al., *Meat intake and cause-specific mortality: a pooled analysis of Asian prospective cohort studies*. Am J Clin Nutr, 2013. **98**(4): p. 1032-41.
17. Marjorie L. McCullough; Andrea S. Robertson, A.C. Eric J. Jacobs, Eugenia E. Calle, and, and M.J. Thun, *A Prospective Study of Diet and Stomach Cancer Mortality in United States Men and Women*. Cancer Epidemiology, Biomarkers & Prevention, 2001.
18. Pan, A., et al., *Red meat consumption and mortality: results from 2 prospective cohort studies*. Arch Intern Med, 2012. **172**(7): p. 555-63.
19. Rosalind A. Breslow<sup>1</sup>, Barry I. Graubard<sup>2</sup>, Rashmi Sinha<sup>3</sup> & Amy F. Subar<sup>4</sup>, *Diet and lung cancer mortality: a 1987 National Health Interview Survey cohort study*. Cancer Causes and Control, 2000.
20. Sabine Rohrmann<sup>1</sup>, Kim Overvad<sup>3</sup>, H Bas Bueno-de-Mesquita<sup>4,5</sup>, Marianne U Jakobsen<sup>3</sup>, Rikke , et al., *Meat consumption and mortality - results from the European Prospective Investigation into Cancer and Nutrition*. BMC Medicine, 2013.
21. Saito, E., et al., *Association between meat intake and mortality due to all-cause and major causes of death in a Japanese population*. PLoS One, 2020. **15**(12): p. e0244007.
22. Segawa, H., et al., *Association of Red Meat Intake with the Risk of Cardiovascular Mortality in General Japanese Stratified by Kidney Function: NIPPON DATA80*. Nutrients, 2020. **12**(12).
23. Shaukat, A., et al., *BMI Is a Risk Factor for Colorectal Cancer Mortality*. Dig Dis Sci, 2017. **62**(9): p. 2511-2517.
24. Steven S. Coughlin, Eugenia E. Calle, Alpa V. Patel & Michael J. Thun, *Predictors of pancreatic cancer mortality among a large cohort of United States adults*. Cancer Causes



- and Control, 2000.
25. Sun, Y., et al., *Association of Major Dietary Protein Sources With All-Cause and Cause-Specific Mortality: Prospective Cohort Study*. J Am Heart Assoc, 2021. **10**(5): p. e015553.
  26. Takata, Y., et al., *Red meat and poultry intakes and risk of total and cause-specific mortality: results from cohort studies of Chinese adults in Shanghai*. PLoS One, 2013. **8**(2): p. e56963.
  27. van den Brandt, P.A., *Red meat, processed meat, and other dietary protein sources and risk of overall and cause-specific mortality in The Netherlands Cohort Study*. Eur J Epidemiol, 2019. **34**(4): p. 351-369.
  28. Zhang, J., et al., *Association of red and processed meat consumption with cardiovascular morbidity and mortality in participants with and without obesity: A prospective cohort study*. Clin Nutr, 2021. **40**(5): p. 3643-3649.
  29. Zheng, Y., et al., *Association of changes in red meat consumption with total and cause specific mortality among US women and men: two prospective cohort studies*. BMJ, 2019. **365**: p. l2110.
  30. Zhong, V.W., et al., *Associations of Processed Meat, Unprocessed Red Meat, Poultry, or Fish Intake With Incident Cardiovascular Disease and All-Cause Mortality*. JAMA Intern Med, 2020. **180**(4): p. 503-512.
  31. Hsu, B., et al., *Total Physical Activity, Exercise Intensity, and Walking Speed as Predictors of All-Cause and Cause-Specific Mortality Over 7 Years in Older Men: The Concord Health and Aging in Men Project*. J Am Med Dir Assoc, 2018. **19**(3): p. 216-222.
  32. Kamada, M., et al., *Strength Training and All-Cause, Cardiovascular Disease, and Cancer Mortality in Older Women: A Cohort Study*. J Am Heart Assoc, 2017. **6**(11).
  33. Liu, Y., et al., *Associations of Resistance Exercise with Cardiovascular Disease Morbidity and Mortality*. Med Sci Sports Exerc, 2019. **51**(3): p. 499-508.
  34. Patel, A.V., et al., *Relationship Between Muscle-Strengthening Activity and Cause-Specific Mortality in a Large US Cohort*. Prev Chronic Dis, 2020. **17**: p. E78.
  35. Porter, A.K., C.C. Cuthbertson, and K.R. Evenson, *Participation in specific leisure-time activities and mortality risk among U.S. adults*. Ann Epidemiol, 2020. **50**: p. 27-34 e1.
  36. Sheehan, C.M. and L. Li, *Associations of Exercise Types with All-Cause Mortality among U.S. Adults*. Med Sci Sports Exerc, 2020. **52**(12): p. 2554-2562.
  37. Siahpush, M., et al., *Muscle-strengthening physical activity is associated with cancer mortality: results from the 1998-2011 National Health Interview Surveys, National Death Index record linkage*. Cancer Causes Control, 2019. **30**(6): p. 663-670.
  38. Stamatakis, E., et al., *Does Strength-Promoting Exercise Confer Unique Health Benefits? A Pooled Analysis of Data on 11 Population Cohorts With All-Cause, Cancer, and Cardiovascular Mortality Endpoints*. Am J Epidemiol, 2018. **187**(5): p. 1102-1112.
  39. Zhao, M., et al., *Recommended physical activity and all cause and cause specific mortality in US adults: prospective cohort study*. BMJ, 2020. **370**: p. m2031.
  40. Dwyer, T., et al., *Objectively Measured Daily Steps and Subsequent Long Term All-Cause Mortality: The Tasped Prospective Cohort Study*. PLoS One, 2015. **10**(11): p. e0141274.
  41. Jefferis, B.J., et al., *Objectively measured physical activity, sedentary behaviour and all-cause mortality in older men: does volume of activity matter more than pattern of*

- accumulation?* Br J Sports Med, 2019. **53**(16): p. 1013-1020.
42. Klenk, J., et al., *Objectively Measured Walking Duration and Sedentary Behaviour and Four-Year Mortality in Older People*. PLoS One, 2016. **11**(4): p. e0153779.
  43. Lee, I.M., et al., *Association of Step Volume and Intensity With All-Cause Mortality in Older Women*. JAMA Intern Med, 2019. **179**(8): p. 1105-1112.
  44. Manas, A., et al., *Association of accelerometer-derived step volume and intensity with hospitalizations and mortality in older adults: A prospective cohort study*. J Sport Health Sci, 2021.
  45. Oftedal, S., et al., *Daily steps and diet, but not sleep, are related to mortality in older Australians*. J Sci Med Sport, 2020. **23**(3): p. 276-282.
  46. Paluch, A.E., et al., *Steps per Day and All-Cause Mortality in Middle-aged Adults in the Coronary Artery Risk Development in Young Adults Study*. JAMA Netw Open, 2021. **4**(9): p. e2124516.
  47. Saint-Maurice, P.F., et al., *Association of Daily Step Count and Step Intensity With Mortality Among US Adults*. JAMA, 2020. **323**(12): p. 1151-1160.

## Supplementary Tables

Table S1. Medical subject headings (MeSH) and non-MeSH keywords used to search relevant publications.

|          |                                                                                                                                                                                                                                                                                                                                                                                                                                                            |
|----------|------------------------------------------------------------------------------------------------------------------------------------------------------------------------------------------------------------------------------------------------------------------------------------------------------------------------------------------------------------------------------------------------------------------------------------------------------------|
| stage 1: | ((red meat) OR (processed meat)) OR (meat products)) OR (Meat consumption) AND ((All-cause mortality) OR (Cardiovascular disease mortality)) OR (Cancer mortality)                                                                                                                                                                                                                                                                                         |
| stage 2: | ((step/day) OR (steps/day)) OR (step counts/day)) OR (step count/day)) OR (walking) AND ((All-cause mortality) OR (Cardiovascular disease mortality)) OR (Cancer mortality)                                                                                                                                                                                                                                                                                |
| stage 3: | ((("resistance train*") OR ("resistance exercise*")) OR ("strength train*")) OR ("strength exercise*")) OR ("strengthening programs")) OR ("weight bearing exercise")) OR ("weight exercise*")) OR ("weight train*")) OR ("circuit training")) OR ("isometric exercise*")) OR ("strength endurance*")) OR ("weight bearing strengthening")) OR ("weight lifting")) AND ((All-cause mortality) OR (Cardiovascular disease mortality)) OR (Cancer mortality) |

**Table S2. Characteristics of included studies for association between meat intake and mortality from cardiovascular disease and cancer.**

| Author, Year of Publication, Country | Age*  | No of participants | Follow-up (years) † | No of deaths | Exposure                          | Exposure assessment | Comparison for meat intake                      | Effect size (95% CI) §                                       | Adjustment¶                                                                         |
|--------------------------------------|-------|--------------------|---------------------|--------------|-----------------------------------|---------------------|-------------------------------------------------|--------------------------------------------------------------|-------------------------------------------------------------------------------------|
| <b>CVD mortality</b>                 |       |                    |                     |              |                                   |                     |                                                 |                                                              |                                                                                     |
| Piet A, 2019, Netherlands            | 55-69 | M 58279<br>W 62573 | 10                  | 5797<br>3026 | Red meat<br>Processed             | FFQ                 | 140.4 vs 41.3g/day<br>30.8 vs 0g/day            | HR 0.95(0.77-1.17)<br>HR 1.26(1.01-1.56)                     | 1,2,4,5,6,9,11,14,19,<br>20,21,22,23,24,25,26,27                                    |
| Alshahrani, 2019, US and Canada      | >25   | 72149              | 11.8                | 7961         | Red meat<br>Processed<br>Combined | FFQ                 | 41.7vs4g/day<br>9.4vs0.7g/day<br>42.8vs1.4g/day | HR 1.26(1.05-1.5)<br>HR 1.12(0.93-1.36)<br>HR 1.34(1.05-1.5) | 1,2,3,4,5,6,9,18,21,22,<br>24,32,33,34,35,36,37,<br>38,39,40,41,42,43,44,45,4647,48 |
| Argyridou, 2019, UK                  | 40-69 | 419075             | 7                   | 15058        | Combined                          | FFQ                 | 7.0vs1.5 servings/week                          | HR1.238(1.062-1.442)                                         | 1,2,3,4,6,8,9,11,14,24,47,48,49,50,51,52                                            |
| Sheehy, 2020, US                     | 38    | W 56314            | 22                  | 5054         | Red meat<br>Processed             | FFQ                 | 1.0vs0.01serving/day<br>1.2vs0.01serving/day    | HR 1.62(1.33-1.97)<br>HR 1.66(1.38-2.00)                     | 4,5,6,8,21,24,28,30,60,<br>61,62                                                    |
| Saito, 2020, Japan                   | 45-74 | M 40072            | 14                  | 6266         | Red meat<br>Processed             | FFQ                 | 92.9vs14.3g/d<br>8.4vs1.3g/d                    | HR 1.36(0.95-1.95)<br>HR 0.85(0.64-1.13)                     | 1,5,6,9,11,14,15,16,18,<br>21,22,24,47,63,64,65                                     |

|             |       |         |          |         |           |          |                         |                    |                         |
|-------------|-------|---------|----------|---------|-----------|----------|-------------------------|--------------------|-------------------------|
|             |       | W 47435 |          | 3620    | Red meat  |          | 90.3vs13.6g/d           | HR 0.62(0.41-0.95) |                         |
|             |       |         |          |         | Processed |          | 11.7vs2.1g/d            | HR 1.01(0.71-1.42) |                         |
| Sinha,      | 50-71 | 500000  | 10       | M 47976 | Red meat  | 124-item | 68.1vs9.3g/1000kcal     | HR 1.27(1.20-1.35) | 4,6,8,9,11,14,19,24,26  |
| 2009, US    |       |         |          |         | Processed | FFQ      | 19.4vs5.1 g/1000kcal    | HR 1.09(1.03-1.15) | 30,37,66                |
|             |       |         |          | W 23276 | Red meat  |          | 65.9vs9.1 g/1000kcal    | HR 1.50(1.37-1.65) |                         |
|             |       |         |          |         | Processed |          | 16.0vs3.8 g/1000kcal    | HR 1.38(1.26-1.51) |                         |
| Pan,        | NA    | M 37698 | 22       | M 8926  | Red meat  | FFQ      | 2.36vs0.22 servings/day | HR 1.32(1.16-1.49) | 1,3,5,6,8,9,11,14,21,22 |
| 2012, US    |       |         |          |         | Processed |          | 2.36vs0.22 servings/day | HR 1.25(1.11-1.41) | 24,28,29,30,34,35,36,43 |
|             |       |         |          |         | Combined  |          | 2.36vs0.22 servings/day | HR 1.35(1.19-1.53) |                         |
|             |       | W 83644 | 28       | W 15000 | Red meat  |          | 3.1vs0.53servings/day   | HR 1.39(1.24-1.55) |                         |
|             |       |         |          |         | Processed |          | 3.1vs0.53servings/day   | HR 1.29(1.15-1.43) |                         |
|             |       |         |          |         | Combined  |          | 3.1vs0.53servings/day   | HR 1.45(1.30-1.63) |                         |
| Takata,     | 40-74 | M 61128 | 334281** | 2733    | Red meat  | FFQ      | 114.9vs20.0g/day        | HR 1.15(0.90-1.48) | 1,4,5,6,7,8,9,11,14,47, |
| 2013, China |       | W 73162 | 803265** | 4210    |           |          | 94.8vs15.0g/day         | HR 0.89(0.72-1.09) | 48,59,67,68,69          |

|                    |       |          |          |        |           |                           |                       |                      |                                   |
|--------------------|-------|----------|----------|--------|-----------|---------------------------|-----------------------|----------------------|-----------------------------------|
| Segawa, 2020,      | ≥30   | M 3986   | 29       | 532    | Red meat  | Standard Tables           | 91.1vs20.1g/day       | HR 1.08(0.88-1.33)   | 1,6,9,11,14,22,24,52,70,          |
| Japan              |       | W 5126   |          | 585    | Red meat  | for Foods in Japan        | 15.2vs73.4g/day       | HR 1.01(0.83-1.24)   | 71                                |
| Bellavia, 2016,    | 45-83 | M 40089  | 16       | 10423  | Red meat  | FFQ                       | 140vs31g/day          | HR 1.29(1.14-1.46)   | 2,4,5,7,8,9,22,24,47              |
| Sweden             |       | W 34556  |          | 7486   |           |                           |                       |                      |                                   |
| Zhang, 2021, UK    | 56    | 428070   | 7.2      | 1837   | Combined  | touchscreen questionnaire | 6.0vs2.0servings/week | HR 1.33(1.19-1.49)   | 1,2,3,4,6,9,72                    |
| Kappeler, 2013,    | >18   | 17611    | 22       | M 1908 | Red meat  | FFQ                       | 45+vs0-6times/week    | HR 0.76(0.26-2.23)   | 1,2,3,6,8,9,11,14,21,22,          |
| US                 |       |          |          |        | Processed |                           | 45+vs0-6times/week    | HR 0.74(0.41-1.33)   | 24,26,29,32,35,36,37,61           |
|                    |       |          |          | W 1775 | Red meat  |                           | 45+vs0-6times/week    | HR 3.50(1.35-9.05)   | 73,74                             |
|                    |       |          |          |        | Processed |                           | 45+vs0-6times/week    | HR 1.01(0.67-1.52)   |                                   |
| Lee, 2013,         | 17-92 | M 112310 | 6.6-15.5 | 23515  | Red meat  | FFQ                       | High/low              | HR 0.87 (0.78, 0.98) | 1,4,5,6,9,11,14,24,76             |
| Asian              |       | W 184411 |          | 16699  | Red meat  |                           | High/low              | HR 1.03 (0.85, 1.25) |                                   |
| Farvid, 2016, Iran | 51.6  | 42403    | 11       | 3291   | Red meat  | FFQ                       | 0.43vs0.02serving/day | HR 1.07(0.90-1.28)   | 1,2,3,4,5,6,8,9,24,30,37,51,70,76 |
| Iqbal, 2021,       | 35-70 | 134297   | 9.5      | 7789   | Red meat  | FFQ                       | ≥250/<50g/week        | HR 0.97 (0.84, 1.14) | 1,2,4,5,6,8,11,12,14,41,          |

|                     |       |          |      |       |           |          |                         |                       |                                          |
|---------------------|-------|----------|------|-------|-----------|----------|-------------------------|-----------------------|------------------------------------------|
| 21 countries        |       |          |      |       | Processed |          | ≥250/<50g/week          | HR 1.39 (0.73, 2.63)  | 22,78,79,80                              |
| Sun, 2021,          | 50-79 | 102521   | 18.1 | 25976 | Red meat  | FFQ      | 3.2/0.3oz equivalent/d  | HR 1.12(1.02-1.23)    | 1,3,4,5,6,8,9,11,14,17                   |
|                     |       |          |      |       | Processed |          | 1.0/0.01oz equivalent/d | HR 0.99(0.91-1.07)    | 22,41,43,67,71,74,81                     |
|                     |       |          |      |       | Combined  |          | 3.9/0.4oz equivalent/d  | HR 1.14(1.04-1.25)    |                                          |
| Cancer mortality    |       |          |      |       |           |          |                         |                       |                                          |
| Piet A, 2019,       | 55-69 | M 58279  | 10   | 5797  | Red meat  | FFQ      | 140.4 vs 41.3g/day      | HR 1.02(0.85-1.21)    | 1,2,4,5,6,9,11,14,19,20                  |
| Netherland          |       | W 62573  |      | 3026  | Processed |          | 30.8 vs 0g/day          | HR 1.16(0.97-1.39)    | 21,22,23,24,25,26,27                     |
| Alshahrani,         | >25   | 72149    | 11.8 | 7961  | Red meat  | FFQ      | 41.7vs4g/day            | HR 1.04(0.85-1.27)    | 1,2,3,4,5,6,9,18,21,22,                  |
| 2019, US            |       |          |      |       | Processed |          | 9.4vs0.7g/day           | HR 1.01(0.83-1.23)    | 24,32,33,34,35,36,37,38                  |
| and Canada          |       |          |      |       | Combined  |          | 42.8vs1.4g/day          | HR 1.00(0.85-1.22)    | 39,40,41,42,43,44,45,46,47,48            |
| Argyridou, 2019, UK | 40-69 | 419075   | 7    | 15058 | Combined  | FFQ      | 7.0vs1.5 servings/week  | HR 1.183(1.082-1.293) | 1,2,3,4,6,8,9,11,14,24,47,48,49,50,51,52 |
| Etemadi,            | 50-71 | M 316505 | 16   | 84848 | Red meat  | 124-item | 50.3vs6.9g/1000kcal     | HR 1.13(1.09-1.17)    | 1,2,3,4,5,6,8,9,11,14,24,                |
| 2017, US            |       | W 220464 |      | 43676 | Processed | FFQ      | 17.2vs2.3g/1000kcal     | HR 1.13(1.09-1.17)    | 29,30,37,54,55,56,57,58                  |

|                       |           |         |    |            |           |          |                            |                    |                                                             |
|-----------------------|-----------|---------|----|------------|-----------|----------|----------------------------|--------------------|-------------------------------------------------------------|
| Sheehy,<br>2020, US   | 38        | W 56314 | 22 | 5054       | Red meat  | FFQ      | 1.0vs0.01serving/day       | HR 1.20(1.01-1.42) | 4,5,6,8,21,24,28,30,60,<br>61,62                            |
|                       |           |         |    |            | Processed |          | 1.2vs0.01serving/day       | HR 1.09(0.93-1.28) |                                                             |
| Saito,<br>2020, Japan | 45-<br>74 | M 40072 | 14 | 6266       | Red meat  | FFQ      | 92.9vs14.3g/d              | HR 1.07(0.91-1.25) | 1,5,6,9,11,14,15,16,18,<br>21,22,24,47,63,64,65             |
|                       |           |         |    |            | Processed |          | 8.4vs1.3g/d                | HR 1.00(0.88-1.13) |                                                             |
|                       |           |         |    |            | Red meat  |          | 90.3vs13.6g/d              | HR 1.23(0.99-1.51) |                                                             |
|                       |           |         |    |            | Processed |          | 11.7vs2.1g/d               | HR 1.10(0.93-1.30) |                                                             |
| Sinha,<br>2009, US    | 50-<br>71 | 500000  | 10 | M<br>47976 | Red meat  | 124-item | 68.1vs9.3g/1000kcal        | HR 1.22(1.16-1.29) | 4,6,8,9,11,14,19,24,26<br>30,37,66                          |
|                       |           |         |    |            | Processed | FFQ      | 19.4vs5.1 g/1000kcal       | HR 1.12(1.06-1.19) |                                                             |
|                       |           |         |    | W<br>23276 | Red meat  |          | 65.9vs9.1 g/1000kcal       | HR 1.20(1.12-1.30) |                                                             |
|                       |           |         |    |            | Processed |          | 16.0vs3.8 g/1000kcal       | HR 1.11(1.04-1.19) |                                                             |
| Pan,<br>2012, US      | NA        | M 37698 | 22 | M 8926     | Red meat  | FFQ      | 2.36vs0.22<br>servings/day | HR 1.18(1.05-1.33) | 1,3,5,6,8,9,11,14,21,22<br>,<br>24,28,29,30,34,35,36,4<br>3 |
|                       |           |         |    |            | Processed |          | 2.36vs0.22<br>servings/day | HR 1.15(1.02-1.29) |                                                             |
|                       |           |         |    |            | Combined  |          | 2.36vs0.22<br>servings/day | HR 1.24(1.09-1.40) |                                                             |
|                       |           |         |    |            | Red meat  |          | 3.1vs0.53servings/day      | HR 1.17(1.08-1.27) |                                                             |



|                 |       |           |          |        |           |             |                       |                      |                         |
|-----------------|-------|-----------|----------|--------|-----------|-------------|-----------------------|----------------------|-------------------------|
|                 |       |           |          |        | Processed |             | 3.1vs0.53servings/day | HR 1.14(1.05-1.23)   |                         |
|                 |       |           |          |        | Combined  |             | 3.1vs0.53servings/day | HR 1.17(1.08-1.28)   |                         |
| Takata,         | 40-74 | M 61483   | 334281** | 2733   | Red meat  | FFQ         | 114.9vs20.0g/day      | HR 1.17(0.95-1.44)   | 1,4,5,6,7,8,9,11,14,47, |
| 2013, China     |       | W 74941   | 803265** | 4210   | Red meat  |             | 94.8vs15.0g/day       | HR 0.92(0.78-1.09)   | 48,59,67,68,69          |
|                 |       | T: 136424 | 1137546  | 6943   | Red meat  |             | 104.85vs17.5g/day     | HR 1.01(0.89-1.16)   |                         |
| Bellavia, 2016, | 45-83 | M 40089   | 16       | 10423  | Red meat  | FFQ         | 140vs31g/day          | HR 1.00(0.88-1.43)   | 2,4,5,7,8,9,22,24,47    |
| Sweden          |       | W 34556   |          | 7486   |           |             |                       |                      |                         |
| Breslow,        | 18-87 | 20195     | 8.5      | 158    | Red meat  | 59-item FFQ | 9.0vs1.4servings/week | RR 1.6(1.0-2.06)     | 1,2,6,7,19              |
| 2000, US        |       |           |          |        | Processed |             | 4.5vs0servings/week   | RR 0.8(0.5-1.4)      |                         |
| Kappeler, 2013, | >18   | 17611     | 22       | M 1908 | Red meat  | FFQ         | 45+vs0-6times/week    | HR 0.76(0.26-2.23)   | 1,2,3,6,8,9,11,14,21,22 |
| US              |       |           |          |        | Processed |             | 45+vs0-6times/week    | HR 1.31(0.84-2.05)   | 24,26,29,32,35,36,37,61 |
|                 |       |           |          |        | W 1775    | Red meat    | 45+vs0-6times/week    | HR 0.63(0.09-4.69)   | 73,74                   |
|                 |       |           |          |        | Processed |             | 45+vs0-6times/week    | HR 0.99(0.45-2.17)   |                         |
| Lee, 2013,      | 17-92 | M 112310  | 6.6-15.5 | 23515  | Red meat  | FFQ         | High/low              | HR 0.90 (0.77, 1.05) | 1,4,5,6,9,11,14,24,76   |

|                    |       |          |      |       |           |     |                        |                      |                                   |
|--------------------|-------|----------|------|-------|-----------|-----|------------------------|----------------------|-----------------------------------|
| Asian              |       | W 184411 |      | 16699 | Red meat  |     | High/low               | HR 0.85 (0.76, 0.94) |                                   |
| Whiteman,          | 35-64 | 10522    | 9    | 514   | Red meat  | FFQ | 4-7vs<1day week-1      | HR 0.88(0.59-1.32)   | 1,2,6                             |
| 1999, UK           |       |          |      |       | Processed |     | 4-7vs<1day week-1      | HR 1.22(0.60-2.51)   |                                   |
| Coughlin, 2000,    | 45-71 | M 483109 | 14   | 1967  | Red meat  | FFQ |                        | RR 1.1(0.9-1.2)      | 1,3,4,6,9,11,14,22,24,30          |
| US                 | 43-71 | W 619199 |      | 1784  | Red meat  |     |                        | RR 0.9(1.08-1.0)     | ,59,75                            |
| McCullough, 2001,  | NR    | M 436654 | 14   | 910   | Processed | FFQ | 4.5+vs<1times/week     | RR 1.08(0.87-1.33)   | 1,3,4,6,24,32,33                  |
| US                 |       | W 533391 |      | 439   | Processed |     | 3+vs<1.5times/week     | RR 1.11(0.88-1.39)   |                                   |
| Farvid, 2016, Iran | 51.6  | 42403    | 11   | 3291  | Red meat  | FFQ | 0.43vs0.02serving/day  | HR 1.03(0.82-1.30)   | 1,2,3,4,5,6,8,9,24,30,37,51,70,76 |
| Shaukat, 2017, US  | 50-80 | 46551    | 30   | 732   | Processed | FFQ | NR                     | HR 1.37(0.74-2.59)   | NR                                |
| Iqbal, 2021,       | 35-70 | 164007   | 9.5  | 7789  | Red meat  | FFQ | ≥250/<50g/week         | HR 0.90 (0.76, 1.05) | 1,2,4,5,6,8,11,12,14,41,          |
| 21 countries       |       |          |      |       | Processed |     | ≥250/<50g/week         | HR 1.84 (1.14, 2.97) | 22,78,79,80                       |
| Sun, 2021,         | 50-79 | 102521   | 18.1 | 25976 | Red meat  | FFQ | 3.2/0.3oz equivalent/d | HR 0.98(0.90-1.08)   | 1,3,4,5,6,8,9,11,14,17            |
| US                 |       |          |      |       | Processed |     | 1.0/0.01oz             | HR 1.0(0.92-1.08)    | 22,41,43,67,71,74,81              |

|          | equivalent/d                                 |
|----------|----------------------------------------------|
| Combined | 3.9/0.4oz equivalent/d    HR 1.01(0.92-1.10) |

FFQ=food frequency questionnaire; HR=hazard ratio; M=men; RR=risk ratio; CI=confidence interval; NR=not reported; W=women.

\*Presented as mean or range.

\*\*Person-years.

†Number of years that individuals were followed up in the prospective cohort studies.

§These effect sizes are for comparison of the highest and the lowest categories.

¶Adjustments: age (1), sex (2), race/ethnicity (3), educational level (4), total energy (5), smoking status (6), smoking pack-years (7), physical activity (8), alcohol intake (9), hormone therapy (10), fruits (11), legumes (12), potatoes (13), vegetables (14), low-fat dairy products (15), high-fat dairy products (16), sugar-sweetened beverages (17), eggs (18), number of cigarettes smoked per day (19), years of smoking (20), history of physician-diagnosed hypertension (21), history of physician-diagnosed diabetes (22), body height (23), BMI (24), non-occupational physical activity (25), use of nutritional supplements (26), in women postmenopausal HRT (27), family history of myocardial infarction (28), family history of diabetes (29), family history of cancer (30), weight (31), aspirin use (32), multivitamin use (33), menopausal status (34), postmeno pausal hormone therapy use for women (35), physician diagnosed hypercholesterolemia (36), marital status (37), exercise (38), sleep (39), the use of statin (40), the use of blood pressure medications (41), Cruciferous vegetables (42), whole grain (43), nuts (44), seeds (45), total dairy (46), fish (47), unprocessed poultry (48), Townsend score (49), employment (50), number of medications (51), salt added to food (52), time TV viewing (53), quintiles of a composite deprivation index (54), perceived health at baseline (55), history of heart disease (56), history of stroke (57), usual activity throughout the day (58), total meat intake (59), geographic region (60), neighborhood SES (socioeconomic status) (61), Alternative Healthy Eating Index without red meat (62), quartile of metabolic equivalent task-hours/d (63), sodium (64), total fat (65), time since quitting for former smokers (66), income (67), occupation (68), comorbidity index (69), systolic blood pressure (70), proteinuria (71), overall health (72), use of ibuprofen (73), family history of hypercholesterolemia (74), history of gallstones (75), residency (76), opium use (77), wealth score (78), location (79), starchy foods (80), unopposed estrogen use (81), year of entering the cohort (82), history of depression (83), following special diets at baseline (84).

**Table S3. Characteristics of included studies for association between muscle-strengthening activity and mortality from cardiovascular disease and cancer.**

| Author, Year of Publication, Country | Age*        | Sample size | Follow-up (years) † | No of cases | Exposure                    | Exposure assessment | Comparison for meat intake     | Effect size (95% CI) § | Adjustment¶                                                      |
|--------------------------------------|-------------|-------------|---------------------|-------------|-----------------------------|---------------------|--------------------------------|------------------------|------------------------------------------------------------------|
| <b>CVD mortality</b>                 |             |             |                     |             |                             |                     |                                |                        |                                                                  |
| Zhao, 2020, US                       | ≥18         | 479856      | 8.75                | 59819       | MSA                         | self-reported       | <2 times/week<br>≥2 times/week | 1<br>0.82 (0.74-0.92)  | 1,2,3,4,5,6,7,8,9                                                |
| Stamatakis, 2017, UK                 | ≥19         | 72459       | 9.2                 | 5763        | Strength-promoting exercise | questionnaire       | None<br>Any                    | 1<br>0.88 (0.71-1.08)  | 1,2,4,6,7,8,11,12                                                |
| Kamada, 2017, US                     | 62.2 (Mean) | 28879       | 12                  | 3055        | Strength training           | questionnaire       | 0<br>≥150min/week              | 1<br>0.72 (0.42–1.22)  | 2,3,4,6,7,8,13,14,15,16 ,<br>17,18,19,20,21,22,23,24,25,26,27,28 |
| LIU, 2018, US                        | 18-89       | 12591       | 10                  | 276         | Resistance exercise         | questionnaire       | 0<br>≥120min/week              | 1<br>0.96 (0.45–2.05)  | 1,2,6,7,8,24,27,29,30                                            |
| Patel,                               | 50-74       | 72462       | 13                  | 17750       | MSA                         | questionnaire       | 0                              | 1                      | 1,2,4,5,6,7,8,31,32,33,                                          |

|                      |              |        |      |       |                             |               |               |                   |                                     |
|----------------------|--------------|--------|------|-------|-----------------------------|---------------|---------------|-------------------|-------------------------------------|
| 2020, US             |              |        |      |       |                             |               | ≥2h/week      | 1.03 (0.90-1.19)  | 34,35,36,37                         |
| Porter, 2020, US     | 46.3 (Mean ) | 17938  | 11.9 | 3799  | Weightlifting               | questionnaire | No            | 1                 | 1,2,3,4,6,7,8,38                    |
|                      |              |        |      |       |                             |               | Yes           | 0.53 (0.21, 1.29) |                                     |
| Hsu, 2017,           | ≥70          | 1705   | 7    | 519   | Muscle                      | questionnaire | No            | 1                 | 2,3,4,6,7,8,26,27,36,50 ,           |
| Australian           |              |        |      |       | strengthening exercise      |               | Yes           | 0.53 (0.27-1.04)  | 51,52,53                            |
| Cancer mortality     |              |        |      |       |                             |               |               |                   |                                     |
| Siahpush, 2018, US   | ≥18          | 310628 | 7.9  | 7275  | MSA                         | questionnaire | No            | 1                 | 1,2,3,4,5,6,7,9,28,32, ,            |
|                      |              |        |      |       |                             |               | Yes           | 0.81 (0.73-0.89)  | 37,54                               |
| Zhao, 2020, US       | ≥18          | 479856 | 8.75 | 59819 | MSA                         | self-reported | <2 times/week | 1                 | 1,2,3,4,5,6,7,8,9                   |
|                      |              |        |      |       |                             |               | ≥2 times/week | 0.85 (0.77-0.95)  |                                     |
| Stamatakis, 2017, UK | ≥19          | 72459  | 9.2  | 5763  | Strength-promoting exercise | questionnaire | None          | 1                 | 1,2,4,6,7,8,11,12                   |
|                      |              |        |      |       |                             |               | Any           | 0.69 (0.57-0.84)  |                                     |
| Kamada, 2017,        | 62.2         | 28879  | 12   | 3055  | Strength                    | questionnaire | 0             | 1                 | 2,3,4,6,7,8,13,14,15,16 ,           |
| US                   | (Mean )      |        |      |       | training                    |               | ≥150min/week  | 1.10 (0.77–1.56)  | 17,18,19,20,21,22,23,24,25,26,27,28 |

|                       |                 |       |      |       |                                     |               |               |                       |                                          |
|-----------------------|-----------------|-------|------|-------|-------------------------------------|---------------|---------------|-----------------------|------------------------------------------|
| Patel, 2020, US       | 50-74           | 72462 | 13   | 17750 | MSA                                 | questionnaire | 0<br>≥2h/week | 1<br>1.02 (0.89–1.17) | 1,2,4,5,6,7,8,31,32,33,<br>34,35,36,37   |
| Porter, 2020, US      | 46.3<br>(Mean ) | 17938 | 11.9 | 3799  | Weightlifting                       | questionnaire | No<br>Yes     | 1<br>0.89 (0.67-1.17) | 1,2,3,4,6,7,8,38                         |
| Hsu, 2017, Australian | ≥70             | 1705  | 7    | 519   | Muscle<br>strengthening<br>exercise | questionnaire | No<br>Yes     | 1<br>0.72 (0.49-1.06) | 2,3,4,6,7,8,26,27,36,50<br>,<br>51,52,53 |

MSA=muscle strengthening activity; HR=hazard ratio; RR=risk ratio; CI=confidence interval; CVD=cardiovascular disease; NR=not reported;

\*Presented as mean or range.

\*\*Person-years.

† The number of years that individuals were followed up in the prospective cohort studies.

§These effect sizes are for comparison of the highest and the lowest categories.

¶Adjustments: Sex(1), age (2), race/ethnicity (3), education (4), marital status (5), body mass index (6), smoking status (7), alcohol intake (8), chronic conditions (9), long-standing illness (10), psychological distress (11), weekly physical activity volume excluding the volume of strength-promoting activity (12), trial randomization (13), postmenopausal status (14), hormone use (15), parental history of myocardial infarction or cancer (16), energy intake (17), saturated fat intake (18), fiber intake (19), fruit and vegetable intake (20), physical examination for screening (21), time per week spent in aerobic (22), MVPA (for strength training and vice versa) (23), incidence of hypertension (24), high cholesterol (25), cardiovascular diseases (26), diabetes mellitus (27), cancer before and during follow-up (28), parental history of CVD (29), hypercholesterolemia (30), survey type (31), self-reported overall health (32), work status (33), TV sitting time (34), aspirin use (35), comorbidity score (36), aerobic moderate-to-vigorous physical activity (37), household (38), use of an

ambulatory device (39), total cholesterol level (40), statin medication use (41), measured mean arterial blood pressure (42), the following physician diagnosed conditions (43), arthritis (44), stroke (45), serum C-reactive protein (46), congestive heart failure (47), coronary artery disease (48), emphysema (49), self-rated health (50), ADL disability (51), depression (52), PASE score (53), income (54), nativity status (55), census region of residence (56), home ownership (57), eGFR (58), need special equipment to walk (59).

Table S4: Results of risk of bias assessment based on the Newcastle-Ottawa scale.

| Study ID               | Selection                                |                                     |                           |                                                                          | Comparability                                                   | Outcome               |                                                 |                                  | Quality rating |
|------------------------|------------------------------------------|-------------------------------------|---------------------------|--------------------------------------------------------------------------|-----------------------------------------------------------------|-----------------------|-------------------------------------------------|----------------------------------|----------------|
|                        | Representativeness of the exposed cohort | Selection of the Non-exposed cohort | Ascertainment of exposure | Demonstration that outcome of interest was not present at start of study | Comparability of cohorts on the basis of the design or analysis | Assessment of outcome | Was follow-up long enough for outcomes to occur | Adequacy of follow up of cohorts |                |
| Zhong et al, 2019      | ☆                                        | ☆                                   | ☆                         | ☆                                                                        | ☆                                                               | ☆                     | ☆                                               | ☆                                | 8              |
| Piet A et al, 2019     | ☆                                        | ☆                                   | ☆                         | ☆                                                                        | ☆                                                               | ☆                     | ☆                                               | ☆                                | 8              |
| Zheng et al, 2019      |                                          | ☆                                   | ☆                         | ☆                                                                        | ☆                                                               | ☆                     | ☆                                               | ☆                                | 7              |
| Alshahrani et al, 2019 | ☆                                        | ☆                                   | ☆                         | ☆                                                                        | ☆                                                               | ☆                     | ☆                                               | ☆                                | 8              |
| Mejborn et al, 2020    | ☆                                        | ☆                                   | ☆                         | ☆                                                                        | ☆                                                               | ☆                     | ☆                                               | ☆                                | 8              |
| Argyridou et al, 2019  | ☆                                        | ☆                                   | ☆                         | ☆                                                                        | ☆                                                               | ☆                     | ☆                                               | ☆                                | 8              |
| Dominguez et al, 2017  | ☆                                        | ☆                                   | ☆                         | ☆                                                                        | ☆                                                               | ☆                     | ☆                                               | ☆                                | 8              |
| Etemadi et al, 2017    | ☆                                        | ☆                                   | ☆                         | ☆                                                                        | ☆                                                               | ☆                     | ☆                                               | ☆                                | 8              |
| Sheehy et al, 2020     |                                          | ☆                                   | ☆                         | ☆                                                                        | ☆                                                               | ☆                     | ☆                                               | ☆                                | 7              |
| Saito et al, 2020      | ☆                                        | ☆                                   | ☆                         | ☆                                                                        | ☆                                                               | ☆                     | ☆                                               | ☆                                | 8              |



|                       |   |   |   |   |   |   |   |   |   |
|-----------------------|---|---|---|---|---|---|---|---|---|
| Rohrmann et al, 2013  | ☆ | ☆ | ☆ | ☆ | ☆ | ☆ | ☆ | ☆ | 8 |
| Sinha et al, 2009     | ☆ | ☆ | ☆ | ☆ | ☆ | ☆ | ☆ | ☆ | 8 |
| An Pan et al, 2012    | ☆ | ☆ | ☆ | ☆ | ☆ | ☆ | ☆ | ☆ | 8 |
| takata et al, 2013    | ☆ | ☆ | ☆ | ☆ | ☆ | ☆ | ☆ | ☆ | 8 |
| Segawa et al, 2020    | ☆ | ☆ | ☆ | ☆ | ☆ | ☆ | ☆ | ☆ | 8 |
| Bellavia et al, 2016  | ☆ | ☆ | ☆ | ☆ | ☆ | ☆ | ☆ | ☆ | 8 |
| Breslow et al, 2000   | ☆ | ☆ | ☆ | ☆ | ☆ | ☆ | ☆ | ☆ | 8 |
| Zhang et al,2021      | ☆ | ☆ |   | ☆ | ☆ | ☆ | ☆ | ☆ | 7 |
| Kappeler et al,2013   | ☆ | ☆ | ☆ | ☆ | ☆ | ☆ | ☆ | ☆ | 8 |
| Lee et al,2013        | ☆ | ☆ | ☆ | ☆ | ☆ | ☆ | ☆ | ☆ | 8 |
| Whiteman et al,1999   | ☆ | ☆ |   | ☆ | ☆ | ☆ | ☆ | ☆ | 7 |
| McCullough et al,2001 | ☆ | ☆ |   | ☆ | ☆ | ☆ | ☆ | ☆ | 7 |
| Farvid et al,2016     | ☆ | ☆ | ☆ | ☆ | ☆ | ☆ | ☆ | ☆ | 8 |
| Shaukat et al,2017    | ☆ | ☆ |   | ☆ | ☆ | ☆ | ☆ | ☆ | 7 |
| Iqbal et al,2021      | ☆ | ☆ | ☆ | ☆ | ☆ | ☆ | ☆ | ☆ | 8 |
| Sun et al, 2021       |   | ☆ | ☆ | ☆ | ☆ | ☆ | ☆ | ☆ | 7 |
| Coughlin et al, 2000  | ☆ | ☆ |   | ☆ | ☆ | ☆ | ☆ | ☆ | 7 |

|                        |   |   |   |   |   |   |   |   |   |
|------------------------|---|---|---|---|---|---|---|---|---|
| Lee et al, 2019        | ☆ | ☆ | ☆ | ☆ | ☆ | ☆ | ☆ | ☆ | 8 |
| Hansen et al, 2020     | ☆ | ☆ | ☆ | ☆ | ☆ | ☆ | ☆ | ☆ | 8 |
| Maurice et al, 2020    | ☆ | ☆ | ☆ | ☆ | ☆ | ☆ | ☆ | ☆ | 8 |
| Jefferis et al, 2017   |   | ☆ | ☆ | ☆ | ☆ | ☆ | ☆ | ☆ | 7 |
| Yamamoto et al, 2018   | ☆ | ☆ | ☆ | ☆ | ☆ |   | ☆ | ☆ | 7 |
| Oftedal et al, 2019    | ☆ | ☆ | ☆ | ☆ | ☆ | ☆ | ☆ | ☆ | 8 |
| Dwyer et al, 2015      | ☆ | ☆ | ☆ | ☆ | ☆ | ☆ | ☆ | ☆ | 8 |
| Paluch et al,2021      | ☆ | ☆ | ☆ | ☆ | ☆ | ☆ | ☆ | ☆ | 8 |
| Manas et al, 2021      |   | ☆ | ☆ | ☆ | ☆ | ☆ |   | ☆ | 6 |
| Klenk et al, 2016      | ☆ | ☆ | ☆ | ☆ | ☆ | ☆ | ☆ | ☆ | 8 |
| Patel et al, 2017      | ☆ | ☆ |   | ☆ | ☆ | ☆ | ☆ | ☆ | 7 |
| Siahpush et al, 2018   | ☆ | ☆ |   | ☆ | ☆ | ☆ | ☆ | ☆ | 7 |
| Zhao et al, 2020       | ☆ | ☆ |   | ☆ | ☆ | ☆ | ☆ | ☆ | 7 |
| Stamatakis et al, 2017 | ☆ | ☆ | ☆ | ☆ | ☆ | ☆ | ☆ | ☆ | 8 |
| Kamada et al, 2017     |   | ☆ | ☆ | ☆ | ☆ | ☆ | ☆ | ☆ | 7 |
| Liu et al, 2018        | ☆ | ☆ |   | ☆ | ☆ | ☆ | ☆ | ☆ | 7 |
| Patel et al, 2020      |   | ☆ |   | ☆ | ☆ | ☆ | ☆ | ☆ | 6 |

|                     |   |   |   |   |   |   |   |   |   |
|---------------------|---|---|---|---|---|---|---|---|---|
| Porter et al, 2020  | ☆ | ☆ | ☆ | ☆ | ☆ | ☆ | ☆ | ☆ | 8 |
| Hsu et al, 2017     |   | ☆ | ☆ | ☆ | ☆ | ☆ | ☆ |   | 6 |
| Sheehan et al, 2020 | ☆ | ☆ |   | ☆ | ☆ | ☆ | ☆ | ☆ | 7 |

Table S5. Association of meat intake, daily steps and muscle-strengthening activity for different subgroups.

| Relationship                                   | Grouping factors       | Group standard    | No. of studies | P-value | I <sup>2</sup> | ES(95%CI)       |
|------------------------------------------------|------------------------|-------------------|----------------|---------|----------------|-----------------|
| <b>Red meat intake and all-cause mortality</b> | Region                 | European          | 5              | 0.002   | 76.0           | 0.97(0.78-1.16) |
|                                                |                        | America           | 11             | 0.000   | 90.5           | 1.22(1.16-1.28) |
|                                                |                        | Asia              | 5              | 0.024   | 64.3           | 1.01(0.92-1.09) |
|                                                |                        | Across the region | 1              | -       | -              | -               |
|                                                | Exposure investigation | FFQ               | 18             | 0.000   | 90.8%          | 1.16(1.10-1.23) |
|                                                |                        | Not FFQ           | 4              | 0.001   | 81.9%          | 0.91(0.78-1.04) |
|                                                | No. of participants    | > 100 thousand    | 12             | 0.000   | 94.9%          | 1.12(1.04-1.20) |
|                                                |                        | < 100 thousand    | 10             | 0.000   | 81.6%          | 1.11(1.00-1.22) |
|                                                | Exposure evaluation    | gram              | 14             | 0.000   | 94.1%          | 1.09(1.01-1.17) |
|                                                |                        | Serving           | 6              | 0.000   | 82.4%          | 1.23(1.13-1.32) |
|                                                |                        | timing            | 2              | 0.026   | 79.9%          | 0.98(0.35-1.61) |
|                                                | Published year         | After 2010        | 19             | 0.000   | 88.5%          | 1.10(1.04-1.17) |
|                                                |                        | Before 2010       | 3              | 0.000   | 95.3%          | 1.16(0.96-1.36) |
| <b>Red meat intake and CVD mortality</b>       | Region                 | European          | 1              | -       | -              | -               |
|                                                |                        | America           | 8              | 0.001   | 72.7%          | 1.33(1.22-1.44) |
|                                                |                        | Asia              | 7              | 0.042   | 54.0%          | 0.96(0.85-1.07) |
|                                                |                        | Across the region | 1              | -       | -              | -               |
|                                                | Exposure investigation | FFQ               | 15             | 0.000   | 87.6%          | 1.16(1.04-1.29) |
|                                                |                        | Not FFQ           | 2              | 0.652   | 0.0%           | 1.04(0.89-1.19) |
|                                                | No. of participants    | > 100 thousand    | 10             | 0.000   | 89.8%          | 1.16(1.02-1.29) |
|                                                |                        | < 100 thousand    | 7              | 0.000   | 76.4%          | 1.14(0.90-1.39) |
|                                                | Exposure evaluation    | gram              | 13             | 0.000   | 86.8%          | 1.08(0.96-1.20) |
|                                                |                        | Serving           | 3              | 0.263   | 25.1%          | 1.39(1.27-1.52) |
|                                                |                        | timing            | 1              | -       | -              | -               |

|                                                      |                        |                   |    |       |       |                 |
|------------------------------------------------------|------------------------|-------------------|----|-------|-------|-----------------|
| <b>Red meat intake and cancer mortality</b>          | Published year         | After 2010        | 15 | 0.000 | 79.9% | 1.11(0.99-1.22) |
|                                                      |                        | Before 2010       | 2  | 0.005 | 87.6% | 1.38(1.15-1.60) |
|                                                      | Region                 | European          | 3  | 0.252 | 27.4% | 1.06(0.90-1.23) |
|                                                      |                        | America           | 12 | 0.000 | 74.2% | 1.12(1.05-1.18) |
|                                                      |                        | Asia              | 5  | 0.016 | 67.2% | 0.98(0.87-1.10) |
|                                                      |                        | Across the region | 1  | -     | -     | -               |
|                                                      | Exposure investigation | FFQ               | 18 | 0.000 | 78.5% | 1.08(1.01-1.14) |
|                                                      |                        | Not FFQ           | 3  | 0.086 | 59.3% | 0.97(0.82-1.13) |
|                                                      | No. of participants    | > 100 thousand    | 14 | 0.000 | 84.4% | 1.05(0.98-1.13) |
|                                                      |                        | < 100 thousand    | 7  | 0.485 | 0.0%  | 1.11(1.01-1.21) |
|                                                      | Exposure evaluation    | gram              | 13 | 0.000 | 83.3% | 1.05(0.98-1.13) |
|                                                      |                        | Serving           | 4  | 0.768 | 0.0%  | 1.18(1.11-1.25) |
|                                                      |                        | timing            | 2  | 0.868 | 0.0%  | 0.87(0.54-1.19) |
|                                                      | Published year         | After 2010        | 15 | 0.000 | 76.3% | 1.05(0.98-1.12) |
|                                                      |                        | Before 2010       | 6  | 0.000 | 84.1% | 1.10(0.98-1.24) |
| <b>Processed meat intake and all-cause mortality</b> | Region                 | European          | 5  | 0.090 | 50.3% | 1.22(1.02-1.41) |
|                                                      |                        | America           | 11 | 0.000 | 81.3% | 1.17(1.13-1.22) |
|                                                      |                        | Asia              | 2  | 0.313 | 1.7%  | 1.00(0.94-1.07) |
|                                                      |                        | Across the region | 1  | -     | -     | -               |
|                                                      | Exposure investigation | FFQ               | 17 | 0.000 | 81.1% | 1.16(1.12-1.21) |
|                                                      |                        | Not FFQ           | 2  | 0.923 | 0.0%  | 1.02(0.82-1.23) |
|                                                      | No. of participants    | > 100 thousand    | 9  | 0.000 | 83.0% | 1.19(1.14-1.24) |
|                                                      |                        | < 100 thousand    | 10 | 0.000 | 70.9% | 1.11(1.03-1.20) |
|                                                      | Exposure evaluation    | gram              | 11 | 0.000 | 83.1% | 1.14(1.09-1.19) |
|                                                      |                        | Serving           | 6  | 0.001 | 74.8% | 1.21(1.13-1.30) |
|                                                      |                        | timing            | 2  | 0.975 | 0.0%  | 1.06(0.84-1.28) |
|                                                      | Published year         | After 2010        | 16 | 0.000 | 79.0% | 1.15(1.10-1.20) |

|                                                  |                        |                   |    |       |       |                 |
|--------------------------------------------------|------------------------|-------------------|----|-------|-------|-----------------|
|                                                  |                        | Before 2010       | 3  | 0.031 | 71.3% | 1.20(1.12-1.28) |
| <b>Processed meat intake and CVD mortality</b>   | Region                 | European          | 2  | 0.117 | 59.3% | 1.44(1.00-1.88) |
|                                                  |                        | America           | 8  | 0.000 | 86.1% | 1.21(1.08-1.33) |
|                                                  |                        | Asia              | 2  | 0.467 | 0.0%  | 0.90(0.70-1.10) |
|                                                  |                        | Across the region | 1  | -     | -     | -               |
|                                                  | Exposure investigation | FFQ               | 13 | -     | -     | -               |
|                                                  |                        | Not FFQ           | 0  | -     | -     | -               |
|                                                  | No. of participants    | > 100 thousand    | 8  | 0.000 | 83.6% | 1.23(1.10-1.35) |
|                                                  |                        | < 100 thousand    | 5  | 0.001 | 79.2% | 1.11(0.83-1.40) |
|                                                  | Exposure evaluation    | gram              | 9  | 0.000 | 79.4% | 1.15(1.02-1.28) |
|                                                  |                        | serving           | 3  | 0.061 | 64.2% | 1.35(1.17-1.53) |
|                                                  |                        | timing            | 1  | -     | -     | -               |
|                                                  | Published year         | After 2010        | 11 | 0.000 | 77.6% | 1.19(1.04-1.33) |
|                                                  |                        | Before 2010       | 2  | 0.000 | 94.0% | 1.23(0.95-1.51) |
| <b>Mixed meat intake and all-cause mortality</b> | Region                 | European          | 3  | 0.759 | 0.0%  | 1.23(1.17-1.29) |
|                                                  |                        | America           | 5  | 0.000 | 92.4% | 1.22(1.12-1.33) |
|                                                  |                        | Asia              | 3  | 0.000 | 88.3% | 1.22(1.06-1.38) |
|                                                  | Exposure investigation | FFQ               | 10 | 0.000 | 85.8% | 1.24(1.18-1.30) |
|                                                  |                        | Not FFQ           | 1  | -     | -     | -               |
|                                                  | No. of participants    | > 100 thousand    | 5  | 0.000 | 82.0% | 1.21(1.09-1.32) |
|                                                  |                        | < 100 thousand    | 6  | 0.000 | 89.4% | 1.24(1.16-1.32) |
|                                                  | Exposure evaluation    | gram              | 4  | 0.000 | 85.9% | 1.20(1.11-1.30) |
|                                                  |                        | serving           | 7  | 0.000 | 89.7% | 1.24(1.14-1.34) |
|                                                  |                        | timing            | 0  | -     | -     | -               |
|                                                  | Published year         | After 2010        | 11 | -     | -     | -               |
|                                                  |                        | Before 2010       | 0  | -     | -     | -               |
| <b>Mixed meat</b>                                | Region                 | European          | 3  | 0.757 | 0.0%  | 1.29(1.20-1.39) |
|                                                  |                        | America           | 4  | 0.000 | 83.1% | 1.38(1.17-1.59) |

|                    |                        |                  |   |       |       |                 |
|--------------------|------------------------|------------------|---|-------|-------|-----------------|
| <b>intake and</b>  |                        | Asia             | 1 | -     | -     | -               |
| <b>CVD</b>         | Exposure investigation | FFQ              | 6 | 0.003 | 72.2% | 1.33(1.20-1.46) |
| <b>mortality</b>   |                        | Not FFQ          | 2 | 0.035 | 77.4% | 1.21(0.95-1.46) |
|                    | No. of participants    | > 100 thousand   | 6 | 0.008 | 68.2% | 1.26(1.15-1.38) |
|                    |                        | < 100 thousand   | 2 | 0.028 | 79.2% | 1.47(1.07-1.87) |
|                    | Exposure evaluation    | gram             | 2 | 0.010 | 66.6% | 1.33(1.20-1.47) |
|                    |                        | serving          | 6 | 0.124 | 57.6% | 1.20(1.19-1.40) |
|                    |                        | timing           | 0 | -     | -     | -               |
|                    | Published year         | After 2010       | 8 | -     | -     | -               |
|                    |                        | Before 2010      | 0 | -     | -     | -               |
| <b>Daily steps</b> | Region                 | European         | 3 | 0.000 | 93.7% | 0.55(0.12-0.97) |
| <b>and</b>         |                        | America          | 4 | 0.000 | 96.8% | 0.51(0.21-0.81) |
| <b>all-cause</b>   |                        | Asia             | 1 | -     | -     | -               |
| <b>mortality</b>   |                        | Australia        | 2 | 0.760 | 0.0%  | 0.94(0.90-0.97) |
|                    | Exposure investigation | Accelerometer    | 6 | 0.000 | 95.1% | 0.48(0.21-0.75) |
|                    |                        | pedometer        | 3 | 0.041 | 68.8% | 0.92(0.85-0.99) |
|                    |                        | by asking        | 1 | -     | -     | -               |
|                    | No. of participants    | > 2000 thousand  | 5 | 0.000 | 94.8% | 0.62(0.50-0.81) |
|                    |                        | < 2000 thousand  | 5 | 0.000 | 97.3% | 0.62(0.36-0.88) |
|                    | Exposure evaluation    | Steps            | 8 | 0.000 | 96.6% | 0.62(0.45-0.80) |
|                    |                        | Walking duration | 2 | 0.028 | 79.3% | 0.64(0.51-0.76) |
| <b>MSA</b>         | Region                 | US               | 6 | 0.168 | 35.9% | 0.94(0.88-1.00) |
| <b>and</b>         |                        | Not US           | 2 | 0.743 | 0.0%  | 0.77(0.68-0.85) |
| <b>all-cause</b>   | No. of participants    | > 3000 thousand  | 5 | 0.064 | 54.9% | 0.93(0.86-1.01) |
| <b>mortality</b>   |                        | < 3000 thousand  | 3 | 0.208 | 36.3% | 0.84(0.69-0.99) |
|                    | Followed-up years      | < 10             | 3 | 0.040 | 69.0% | 0.82(0.72-0.93) |

|                                          |                     |                    |   |       |       |                 |
|------------------------------------------|---------------------|--------------------|---|-------|-------|-----------------|
| <b>MSA<br/>and<br/>CVD<br/>mortality</b> | Exposure evaluation | > 10               | 5 | 0.797 | 0.0%  | 0.99(0.92-1.05) |
|                                          |                     | Time               | 5 | 0.002 | 75.9% | 0.91(0.80-1.01) |
|                                          | Region              | No/yes             | 3 | 0.329 | 10.1% | 0.91(0.80-1.02) |
|                                          |                     | US                 | 5 | 0.093 | 49.8% | 0.87(0.71-1.02) |
|                                          | No. of participants | Not US             | 2 | 0.108 | 61.2% | 0.75(0.41-1.08) |
|                                          |                     | > 3000<br>thousand | 4 | 0.031 | 66.3% | 0.86(0.67-1.04) |
|                                          | Follow-up years     | < 3000<br>thousand | 3 | 0.417 | 0.0%  | 0.82(0.66-0.98) |
|                                          |                     | < 10               | 3 | 0.275 | 22.6% | 0.81(0.71-0.92) |
|                                          |                     | > 10               | 4 | 0.195 | 36.2% | 0.88(0.63-1.12) |
|                                          | Exposure evaluation | Time               | 5 | 0.168 | 38.0% | 0.89(0.78-1.00) |
|                                          |                     | No/yes             | 2 | 1.000 | 0.0%  | 0.53(0.22-0.84) |



Table S6: The balanced relationship between meat intake and physical activity (all-cause mortality).

| All-cause mortality |                       |                   |                                  |                 |                 |                         |                               |
|---------------------|-----------------------|-------------------|----------------------------------|-----------------|-----------------|-------------------------|-------------------------------|
| Red meat(g/day)     | Processed meat(g/day) | Mixed meat(g/day) | Increase d risk of mortalit y(%) | MSA(mins/ week) | MSA(mins/w eek) | Daily steps(steps /day) | Reduced risk of mortality (%) |
| 0                   | 0                     | 0                 | 0                                | 0               | 145.27          | 1895                    | 0                             |
| 32.38               | 13.73                 | 25.44             | 5                                | 8.04            | 126.47          | 2394.99                 | 5                             |
| 53.30               | 21.56                 | 49.57             | 10                               | 16.5            | 107.67          | 2975.67                 | 10                            |
| 74.07               | 30.93                 | 73.71             | 15                               | 25.6            | 90.58           | 3548.90                 | 15                            |
| <b>103.40</b>       | <b>50</b>             | <b>112.50</b>     | <b>20</b>                        | <b>39.5</b>     | <b>61.52</b>    | <b>4100.00</b>          | <b>20</b>                     |
| 128.23              | 58.13                 | 139.27            | 25                               | -               | -               | 4777.27                 | 25                            |
| 163.18              | 82.53                 | 191.08            | 30                               | -               | -               | 5432.40                 | 30                            |
| 196.32              | 106.94                | 325.94            | 35                               | -               | -               | 6087.53                 | 35                            |
| -                   | 129.60                | -                 | 40                               | -               | -               | 6824.55                 | 40                            |
| -                   | 154.01                | -                 | 45                               | -               | -               | 7971.02                 | 45                            |
| -                   | 178.42                | -                 | 50                               | -               | -               | 11815.00                | 50                            |
| -                   | 199.95                | -                 | 55                               |                 |                 |                         |                               |

Table S7: The balanced relationship between meat intake and physical activity (CVD mortality).

| CVD mortality   |                       |                   |                                |                |                |                               |
|-----------------|-----------------------|-------------------|--------------------------------|----------------|----------------|-------------------------------|
| Red meat(g/day) | Processed meat(g/day) | Mixed meat(g/day) | Increased risk of mortality(%) | MSA(mins/week) | MSA(mins/week) | Reduced risk of mortality (%) |
| 0               | 0                     | 0                 | 0                              | 0              | 131.76         | 0                             |
| 43.44           | 37.41                 | 34.83             | 5                              | 7.15           | 92.07          | 5                             |
| 59.18           | 51.28                 | 72.49             | 10                             | 14.30          | 72.66          | 10                            |
| 76.67           | 72.13                 | 113.83            | 15                             | 21.30          | 52.96          | 15                            |
| 97.66           | 105.38                | 154.44            | 20                             | 28.3           | 33.40          | 20                            |
| <b>105.40</b>   | <b>119.22</b>         | <b>168</b>        | <b>22</b>                      | <b>30</b>      | -              | <b>22</b>                     |
| 121.19          | 148.87                | 193.59            | -                              | -              | -              | -                             |
| 145.67          | 194.22                | 231.44            | 30                             | -              | -              | -                             |
| 170.15          | -                     | 264.59            | 35                             | -              | -              | -                             |
| 196.38          | -                     | 299.63            | 40                             | -              | -              | -                             |
| -               | -                     | 334.03            | 45                             | -              | -              | -                             |

Table S8: The balanced relationship between meat intake and physical activity (cancer mortality).

| Cancer mortality |                       |                   |                                |                |                |                               |
|------------------|-----------------------|-------------------|--------------------------------|----------------|----------------|-------------------------------|
| Red meat(g/day)  | Processed meat(g/day) | Mixed meat(g/day) | Increased risk of mortality(%) | MSA(mins/week) | MSA(mins/week) | Reduced risk of mortality (%) |
| 0                | 0                     | 0                 | 0                              | 0              | 139.06         | 0                             |
| 44.57            | 19.39                 | 54.42             | 5                              | 14.28          | 114.28         | 5                             |
| 70.85            | 45.56                 | 92.87             | 10                             | 25.36          | 90.23          | 10                            |
| <b>88.35</b>     | <b>69.70</b>          | <b>117.34</b>     | <b>13</b>                      | <b>30.00</b>   | -              | <b>13</b>                     |
| 109.36           | 139.61                | 138.33            | 15                             |                |                |                               |
| 144.37           | -                     | 180.31            | 18                             |                |                |                               |
| 168.87           | -                     | 218.82            | 20                             |                |                |                               |

**Table S9: The balanced relationship between meat intake and physical activity.**

|           | Increased risk of mortality(%) |                         |                               |                           | Reduced risk of mortality(%) |                         |                 |                 |
|-----------|--------------------------------|-------------------------|-------------------------------|---------------------------|------------------------------|-------------------------|-----------------|-----------------|
|           | mortality                      | Red meat intake (g/day) | Processed meat intake (g/day) | Mixed meat intake (g/day) | mortality                    | Daily steps (steps/day) | MSA (mins/week) | MSA (mins/week) |
| All-cause | 0                              | 0                       | 0                             | 0                         | 0                            | 1895                    | 0               | 145.27          |
|           | 5                              | 32.38                   | 13.73                         | 25.44                     | 5                            | 2394.99                 | 8.04            | 126.47          |
|           | 10                             | 53.30                   | 21.56                         | 49.57                     | 10                           | 2975.67                 | 16.5            | 107.67          |
|           | 15                             | 74.07                   | 30.93                         | 73.71                     | 15                           | 3548.90                 | 25.6            | 90.58           |
|           | <b>20</b>                      | <b>103.40</b>           | <b>50</b>                     | <b>112.50</b>             | <b>20</b>                    | <b>4100.00</b>          | <b>39.5</b>     | <b>61.52</b>    |
|           | 25                             | 128.23                  | 58.13                         | 139.27                    | 25                           | 4777.27                 | -               | -               |
|           | 30                             | 163.18                  | 82.53                         | 191.08                    | 30                           | 5432.40                 | -               | -               |
|           | 35                             | 196.32                  | 106.94                        | 325.94                    | 35                           | 6087.53                 | -               | -               |
|           | 40                             | -                       | 129.60                        | -                         | 40                           | 6824.55                 | -               | -               |
|           | 45                             | -                       | 154.01                        | -                         | 45                           | 7971.02                 | -               | -               |
|           | <b>50</b>                      | -                       | <b>178.42</b>                 | -                         | <b>50</b>                    | <b>11815.00</b>         | -               | -               |
| CVD       | 0                              | 0                       | 0                             | 0                         | 0                            | -                       | 0               | 131.76          |
|           | 5                              | 43.44                   | 37.41                         | 34.83                     | 5                            | -                       | 7.15            | 92.07           |
|           | 10                             | 59.18                   | 51.28                         | 72.49                     | 10                           | -                       | 14.30           | 72.66           |
|           | 15                             | 76.67                   | 72.13                         | 113.83                    | 15                           | -                       | 21.30           | 52.96           |
|           | 20                             | 97.66                   | 105.38                        | 154.44                    | 20                           | -                       | 28.3            | 33.40           |
|           | <b>22</b>                      | <b>105.40</b>           | <b>119.22</b>                 | <b>168</b>                | <b>22</b>                    | --                      | 30              | -               |
|           | <b>25</b>                      | <b>121.19</b>           | <b>148.87</b>                 | <b>193.59</b>             | -                            | -                       | -               | -               |
| Cancer    | 0                              | 0                       | 0                             | 0                         | 0                            | -                       | 0               | 148.12          |
|           | 5                              | 44.57                   | 19.39                         | 54.42                     | 5                            | -                       | 13.13           | 133.13          |
|           | 10                             | 70.85                   | 45.56                         | 92.87                     | 10                           | -                       | 20.19           | 114.06          |
|           | <b>13</b>                      | <b>88.35</b>            | <b>69.70</b>                  | <b>117.34</b>             | <b>13</b>                    | -                       | <b>30</b>       | -               |
|           | 15                             | 109.36                  | 139.61                        | 138.33                    |                              |                         |                 |                 |

|  |    |        |   |        |  |  |  |   |
|--|----|--------|---|--------|--|--|--|---|
|  | 20 | 144.37 | - | 180.31 |  |  |  | - |
|--|----|--------|---|--------|--|--|--|---|

**Table S10: The pooled estimates of red and processed meat, physical activity and all-cause, cardiovascular disease (CVD) and cancer mortality.**

| Meat intake, physical activity and mortality | No. of Papers<br>(Participants) | ES(95%CI)       | $P_{ES}$ | $I^2(\%)$ | Egger's<br>( $P$ -value) | Begg's<br>( $P$ -value) | GRADE Certainty of Evidence                 |
|----------------------------------------------|---------------------------------|-----------------|----------|-----------|--------------------------|-------------------------|---------------------------------------------|
| <b>Red meat and mortality</b>                |                                 |                 |          |           |                          |                         |                                             |
| All-cause mortality                          | 18                              | 1.12(1.04-1.20) | <0.01    | 92%       | 0.069                    | 0.430                   | Very low<br>Downgraded due to inconsistency |
| CVD mortality                                | 13                              | 1.14(1.03-1.26) | <0.01    | 85%       | 0.208                    | 0.596                   | Very low<br>Downgraded due to inconsistency |
| Cancer mortality                             | 16                              | 1.07(1.01-1.13) | <0.01    | 77%       | 0.167                    | 0.695                   | Very low<br>Downgraded due to inconsistency |
| <b>Processed meat and mortality</b>          |                                 |                 |          |           |                          |                         |                                             |
| All-cause mortality                          | 16                              | 1.17(1.11-1.22) | <0.01    | 80%       | 0.638                    | 0.576                   | Very low<br>Downgraded due to inconsistency |
| CVD mortality                                | 10                              | 1.21(1.08-1.35) | <0.01    | 83%       | 0.428                    | 0.760                   | Very low<br>Downgraded due to inconsistency |
| Cancer mortality                             | 15                              | 1.11(1.09-1.14) | 0.43     | 2%        | 0.759                    | 0.675                   | low                                         |
| <b>Mixed meat and mortality</b>              |                                 |                 |          |           |                          |                         |                                             |
| All-cause mortality                          | 10                              | 1.22(1.15-1.30) | <0.01    | 86%       | 0.85                     | 0.876                   | Very low<br>Downgraded due to inconsistency |
| CVD mortality                                | 8                               | 1.30(1.20-1.41) | <0.01    | 67%       | 0.485                    | 0.917                   | Very low<br>Downgraded due to inconsistency |

|                                                    |            |                 |       |     |       |       |                                                                |
|----------------------------------------------------|------------|-----------------|-------|-----|-------|-------|----------------------------------------------------------------|
| Cancer mortality                                   | 8          | 1.15(1.12-1.19) | 0.08  | 46% | 0.159 | 0.037 | Very low<br>Downgraded due to publication                      |
| <b>muscle-strengthening activity and mortality</b> |            |                 |       |     |       |       |                                                                |
| All-cause mortality                                | 8(712617)  | 0.91(0.88-0.98) | <0.01 | 62% | 0.994 | 0.902 | Very low<br>Downgraded due to inconsistency                    |
| CVD mortality                                      | 7(207512)  | 0.88(0.81-0.95) | 0.11  | 43% | 0.380 | 1     | low                                                            |
| Cancer mortality                                   | 7(508807)  | 0.85(0.76-0.94) | 0.04  | 54% | 0.763 | 1     | Very low<br>Downgraded due to inconsistency                    |
| <b>Daily steps and mortality</b>                   |            |                 |       |     |       |       |                                                                |
| All-cause mortality                                | 11(177297) | 0.58(0.45-0.74) | <0.01 | 93% | 0.040 | 0.815 | Very low<br>Downgraded due to inconsistency<br>and publication |

GRADE = Grading of Recommendations Assessment, Development and Evaluation.

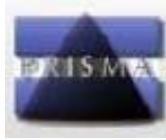

## PRISMA 2020 Checklist

Supplementary Table S11 PRISMA Checklist of the systematic review and meta-analysis

| Section and Topic             | Item # | Checklist item                                                                                                                                                                                                                                                                                       | Location where item is reported |
|-------------------------------|--------|------------------------------------------------------------------------------------------------------------------------------------------------------------------------------------------------------------------------------------------------------------------------------------------------------|---------------------------------|
| <b>TITLE</b>                  |        |                                                                                                                                                                                                                                                                                                      |                                 |
| Title                         | 1      | Identify the report as a systematic review.                                                                                                                                                                                                                                                          | P1                              |
| <b>ABSTRACT</b>               |        |                                                                                                                                                                                                                                                                                                      |                                 |
| Abstract                      | 2      | See the PRISMA 2020 for Abstracts checklist.                                                                                                                                                                                                                                                         | P2-3                            |
| <b>INTRODUCTION</b>           |        |                                                                                                                                                                                                                                                                                                      |                                 |
| Rationale                     | 3      | Describe the rationale for the review in the context of existing knowledge.                                                                                                                                                                                                                          | P4-5                            |
| Objectives                    | 4      | Provide an explicit statement of the objective(s) or question(s) the review addresses.                                                                                                                                                                                                               | P4-5                            |
| <b>METHODS</b>                |        |                                                                                                                                                                                                                                                                                                      |                                 |
| Eligibility criteria          | 5      | Specify the inclusion and exclusion criteria for the review and how studies were grouped for the syntheses.                                                                                                                                                                                          | P5-6                            |
| Information sources           | 6      | Specify all databases, registers, websites, organisations, reference lists and other sources searched or consulted to identify studies. Specify the date when each source was last searched or consulted.                                                                                            | P5                              |
| Search strategy               | 7      | Present the full search strategies for all databases, registers and websites, including any filters and limits used.                                                                                                                                                                                 | P5, Figure 1, Table S1          |
| Selection process             | 8      | Specify the methods used to decide whether a study met the inclusion criteria of the review, including how many reviewers screened each record and each report retrieved, whether they worked independently, and if applicable, details of automation tools used in the process.                     | P5-6, Figure 1                  |
| Data collection process       | 9      | Specify the methods used to collect data from reports, including how many reviewers collected data from each report, whether they worked independently, any processes for obtaining or confirming data from study investigators, and if applicable, details of automation tools used in the process. | P5-6                            |
| Data items                    | 10a    | List and define all outcomes for which data were sought. Specify whether all results that were compatible with each outcome domain in each study were sought (e.g. for all measures, time points, analyses), and if not, the methods used to decide which results to collect.                        | P6                              |
|                               | 10b    | List and define all other variables for which data were sought (e.g. participant and intervention characteristics, funding sources). Describe any assumptions made about any missing or unclear information.                                                                                         | P6-7                            |
| Study risk of bias assessment | 11     | Specify the methods used to assess risk of bias in the included studies, including details of the tool(s) used, how many reviewers assessed each study and whether they worked independently, and if applicable, details of automation tools used in the process.                                    | P6                              |
| Effect measures               | 12     | Specify for each outcome the effect measure(s) (e.g. risk ratio, mean difference) used in the synthesis or presentation of results.                                                                                                                                                                  | P6                              |
| Synthesis methods             | 13a    | Describe the processes used to decide which studies were eligible for each synthesis (e.g. tabulating the study intervention characteristics and comparing against the planned groups for each synthesis (item #5)).                                                                                 | P5                              |
|                               | 13b    | Describe any methods required to prepare the data for presentation or synthesis, such as handling of missing summary statistics, or data conversions.                                                                                                                                                | P6-7                            |



| Section and Topic             | Item # | Checklist item                                                                                                                                                                                                                                                                       | Location where item is reported                      |
|-------------------------------|--------|--------------------------------------------------------------------------------------------------------------------------------------------------------------------------------------------------------------------------------------------------------------------------------------|------------------------------------------------------|
|                               | 13c    | Describe any methods used to tabulate or visually display results of individual studies and syntheses.                                                                                                                                                                               | P6-7                                                 |
|                               | 13d    | Describe any methods used to synthesize results and provide a rationale for the choice(s). If meta-analysis was performed, describe the model(s), method(s) to identify the presence and extent of statistical heterogeneity, and software package(s) used.                          | P6-7                                                 |
|                               | 13e    | Describe any methods used to explore possible causes of heterogeneity among study results (e.g. subgroup analysis, meta-regression).                                                                                                                                                 | P6-7                                                 |
|                               | 13f    | Describe any sensitivity analyses conducted to assess robustness of the synthesized results.                                                                                                                                                                                         | P6                                                   |
| Reporting bias assessment     | 14     | Describe any methods used to assess risk of bias due to missing results in a synthesis (arising from reporting biases).                                                                                                                                                              | P6                                                   |
| Certainty assessment          | 15     | Describe any methods used to assess certainty (or confidence) in the body of evidence for an outcome.                                                                                                                                                                                | P6                                                   |
| <b>RESULTS</b>                |        |                                                                                                                                                                                                                                                                                      |                                                      |
| Study selection               | 16a    | Describe the results of the search and selection process, from the number of records identified in the search to the number of studies included in the review, ideally using a flow diagram.                                                                                         | Figure 1                                             |
|                               | 16b    | Cite studies that might appear to meet the inclusion criteria, but which were excluded, and explain why they were excluded.                                                                                                                                                          | Figure 1                                             |
| Study characteristics         | 17     | Cite each included study and present its characteristics.                                                                                                                                                                                                                            | Table 1-3, Table S2-S3, Supplementary Results P3     |
| Risk of bias in studies       | 18     | Present assessments of risk of bias for each included study.                                                                                                                                                                                                                         | P7, Table S4                                         |
| Results of individual studies | 19     | For all outcomes, present, for each study: (a) summary statistics for each group (where appropriate) and (b) an effect estimate and its precision (e.g. confidence/credible interval), ideally using structured tables or plots.                                                     | Figure 2-3, Figure S1-S3,                            |
| Results of syntheses          | 20a    | For each synthesis, briefly summarise the characteristics and risk of bias among contributing studies.                                                                                                                                                                               | Supplementary Results P3-5                           |
|                               | 20b    | Present results of all statistical syntheses conducted. If meta-analysis was done, present for each the summary estimate and its precision (e.g. confidence/credible interval) and measures of statistical heterogeneity. If comparing groups, describe the direction of the effect. | Supplementary Results P3-5, Figure 2-3, Figure S1-S3 |
|                               | 20c    | Present results of all investigations of possible causes of heterogeneity among study results.                                                                                                                                                                                       | Supplementary Results P3-5, P10-11, Table S5         |
|                               | 20d    | Present results of all sensitivity analyses conducted to assess the robustness of the synthesized results.                                                                                                                                                                           | Figure S9-S13                                        |
| Reporting biases              | 21     | Present assessments of risk of bias due to missing results (arising from reporting biases) for each synthesis assessed.                                                                                                                                                              | Supplementary Results P3-5                           |
| Certainty of evidence         | 22     | Present assessments of certainty (or confidence) in the body of evidence for each outcome assessed.                                                                                                                                                                                  | P11, Figure S10                                      |
| <b>DISCUSSION</b>             |        |                                                                                                                                                                                                                                                                                      |                                                      |
| Discussion                    | 23a    | Provide a general interpretation of the results in the context of other evidence.                                                                                                                                                                                                    | P112-15                                              |
|                               | 23b    | Discuss any limitations of the evidence included in the review.                                                                                                                                                                                                                      | P15-16                                               |

| Section and Topic                              | Item # | Checklist item                                                                                                                                                                                                                             | Location where item is reported |
|------------------------------------------------|--------|--------------------------------------------------------------------------------------------------------------------------------------------------------------------------------------------------------------------------------------------|---------------------------------|
|                                                | 23c    | Discuss any limitations of the review processes used.                                                                                                                                                                                      | P15-16                          |
|                                                | 23d    | Discuss implications of the results for practice, policy, and future research.                                                                                                                                                             | P16                             |
| <b>OTHER INFORMATION</b>                       |        |                                                                                                                                                                                                                                            |                                 |
| Registration and protocol                      | 24a    | Provide registration information for the review, including register name and registration number, or state that the review was not registered.                                                                                             | P5                              |
|                                                | 24b    | Indicate where the review protocol can be accessed, or state that a protocol was not prepared.                                                                                                                                             | P5                              |
|                                                | 24c    | Describe and explain any amendments to information provided at registration or in the protocol.                                                                                                                                            | NA                              |
| Support                                        | 25     | Describe sources of financial or non-financial support for the review, and the role of the funders or sponsors in the review.                                                                                                              | P3                              |
| Competing interests                            | 26     | Declare any competing interests of review authors.                                                                                                                                                                                         | P16                             |
| Availability of data, code and other materials | 27     | Report which of the following are publicly available and where they can be found: template data collection forms; data extracted from included studies; data used for all analyses; analytic code; any other materials used in the review. | Table 1-3, Table S2-S3,         |

From: Page MJ, McKenzie JE, Bossuyt PM, Boutron I, Hoffmann TC, Mulrow CD, et al. The PRISMA 2020 statement: an updated guideline for reporting systematic reviews. BMJ 2021;372:n71. doi: 10.1136/bmj.n71

For more information, visit: <http://www.prisma-statement.org/>

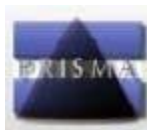

## PRISMA 2020 for Abstracts Checklist

**Supplementary Table S12 PRISMA Abstracts Checklist of the systematic review and meta-analysis**

| Section and Topic       | Item # | Checklist item                                                                                                                                                                                                                                                                                        | Reported (Yes/No) |
|-------------------------|--------|-------------------------------------------------------------------------------------------------------------------------------------------------------------------------------------------------------------------------------------------------------------------------------------------------------|-------------------|
| <b>TITLE</b>            |        |                                                                                                                                                                                                                                                                                                       |                   |
| Title                   | 1      | Identify the report as a systematic review.                                                                                                                                                                                                                                                           | Yes               |
| <b>BACKGROUND</b>       |        |                                                                                                                                                                                                                                                                                                       |                   |
| Objectives              | 2      | Provide an explicit statement of the main objective(s) or question(s) the review addresses.                                                                                                                                                                                                           | Yes               |
| <b>METHODS</b>          |        |                                                                                                                                                                                                                                                                                                       |                   |
| Eligibility criteria    | 3      | Specify the inclusion and exclusion criteria for the review.                                                                                                                                                                                                                                          | Yes               |
| Information sources     | 4      | Specify the information sources (e.g. databases, registers) used to identify studies and the date when each was last searched.                                                                                                                                                                        | Yes               |
| Risk of bias            | 5      | Specify the methods used to assess risk of bias in the included studies.                                                                                                                                                                                                                              | Yes               |
| Synthesis of results    | 6      | Specify the methods used to present and synthesise results.                                                                                                                                                                                                                                           | Yes               |
| <b>RESULTS</b>          |        |                                                                                                                                                                                                                                                                                                       |                   |
| Included studies        | 7      | Give the total number of included studies and participants and summarise relevant characteristics of studies.                                                                                                                                                                                         | Yes               |
| Synthesis of results    | 8      | Present results for main outcomes, preferably indicating the number of included studies and participants for each. If meta-analysis was done, report the summary estimate and confidence/credible interval. If comparing groups, indicate the direction of the effect (i.e. which group is favoured). | Yes               |
| <b>DISCUSSION</b>       |        |                                                                                                                                                                                                                                                                                                       |                   |
| Limitations of evidence | 9      | Provide a brief summary of the limitations of the evidence included in the review (e.g. study risk of bias, inconsistency and imprecision).                                                                                                                                                           | Yes               |
| Interpretation          | 10     | Provide a general interpretation of the results and important implications.                                                                                                                                                                                                                           | Yes               |
| <b>OTHER</b>            |        |                                                                                                                                                                                                                                                                                                       |                   |
| Funding                 | 11     | Specify the primary source of funding for the review.                                                                                                                                                                                                                                                 | Yes               |
| Registration            | 12     | Provide the register name and registration number.                                                                                                                                                                                                                                                    | Yes               |

**Supplementary Table S13: Number of studies from different databases.**

| <b>Meat intake</b>                                                |                               | <b>MSA</b>                             |                               | <b>Daily steps</b>                                                       |                               |
|-------------------------------------------------------------------|-------------------------------|----------------------------------------|-------------------------------|--------------------------------------------------------------------------|-------------------------------|
| <b>databases</b>                                                  | <b>the number of articles</b> | <b>databases</b>                       | <b>the number of articles</b> | <b>databases</b>                                                         | <b>the number of articles</b> |
| ARIC study, CARDIA study, CHS, FHS, FOS, and MESA                 | 1                             | NHIS                                   | 3                             | Women's Health Study (WHS)                                               | 1                             |
| Netherlands Cohort Study                                          | 1                             | CHAMP                                  | 1                             | a nation-wide multicenter physical activity surveillance study in Norway | 1                             |
| The Nurses' Health Study The Health Professionals' Followup Study | 2                             | NHANES                                 | 1                             | Toledo Study for Healthy Aging (TSHA)                                    | 1                             |
| AHS-2                                                             | 1                             | CPSIINC                                | 1                             | British Regional Heart Study                                             | 1                             |
| The Danish National Survey on Diet and Physical Activity          | 1                             | The Aerobics Center Longitudinal Study | 1                             | elderly people living in Niigata City, Japan                             | 1                             |
| UK Biobank                                                        | 2                             | Women's Health Study                   | 1                             | The AUSDIAB study                                                        | 1                             |
| The SUN project                                                   | 1                             | HSE/SHS                                | 1                             | Coronary Artery Risk Development in Young Adults (CARDIA) study          | 1                             |
| NIH-AARP Diet and Health Study                                    | 1                             |                                        |                               | NHANES                                                                   | 1                             |
| BWHS                                                              | 1                             |                                        |                               | The ActiFE Ulm study                                                     | 1                             |
| JPHC study                                                        | 1                             |                                        |                               | (CPS)-II Nutrition Cohort                                                | 1                             |
| EPIC                                                              | 1                             |                                        |                               | HCS                                                                      | 1                             |
| the NIH-AARP Diet and Health Study.                               | 1                             |                                        |                               |                                                                          |                               |
| SWHS and SMHS                                                     | 1                             |                                        |                               |                                                                          |                               |
| NIPPON DATA80                                                     | 1                             |                                        |                               |                                                                          |                               |
| COSM and SMC                                                      | 1                             |                                        |                               |                                                                          |                               |
| NHIS                                                              | 1                             |                                        |                               |                                                                          |                               |
| NHANES III                                                        | 1                             |                                        |                               |                                                                          |                               |

|                                                                                                      |   |  |  |  |  |
|------------------------------------------------------------------------------------------------------|---|--|--|--|--|
| 8 prospective cohort studies from Bangladesh, mainland China, Japan, Korea, and Taiwan were included | 1 |  |  |  |  |
| OXCHECK study                                                                                        | 1 |  |  |  |  |
| a mailed questionnaire for the ACS's2 CPS II                                                         | 2 |  |  |  |  |
| The Golestan Cohort Study                                                                            | 1 |  |  |  |  |
| The Minnesota Colon Cancer Control Study                                                             | 1 |  |  |  |  |
| PURE Study                                                                                           | 1 |  |  |  |  |
| The WHI study                                                                                        | 1 |  |  |  |  |

## Supplementary Figures

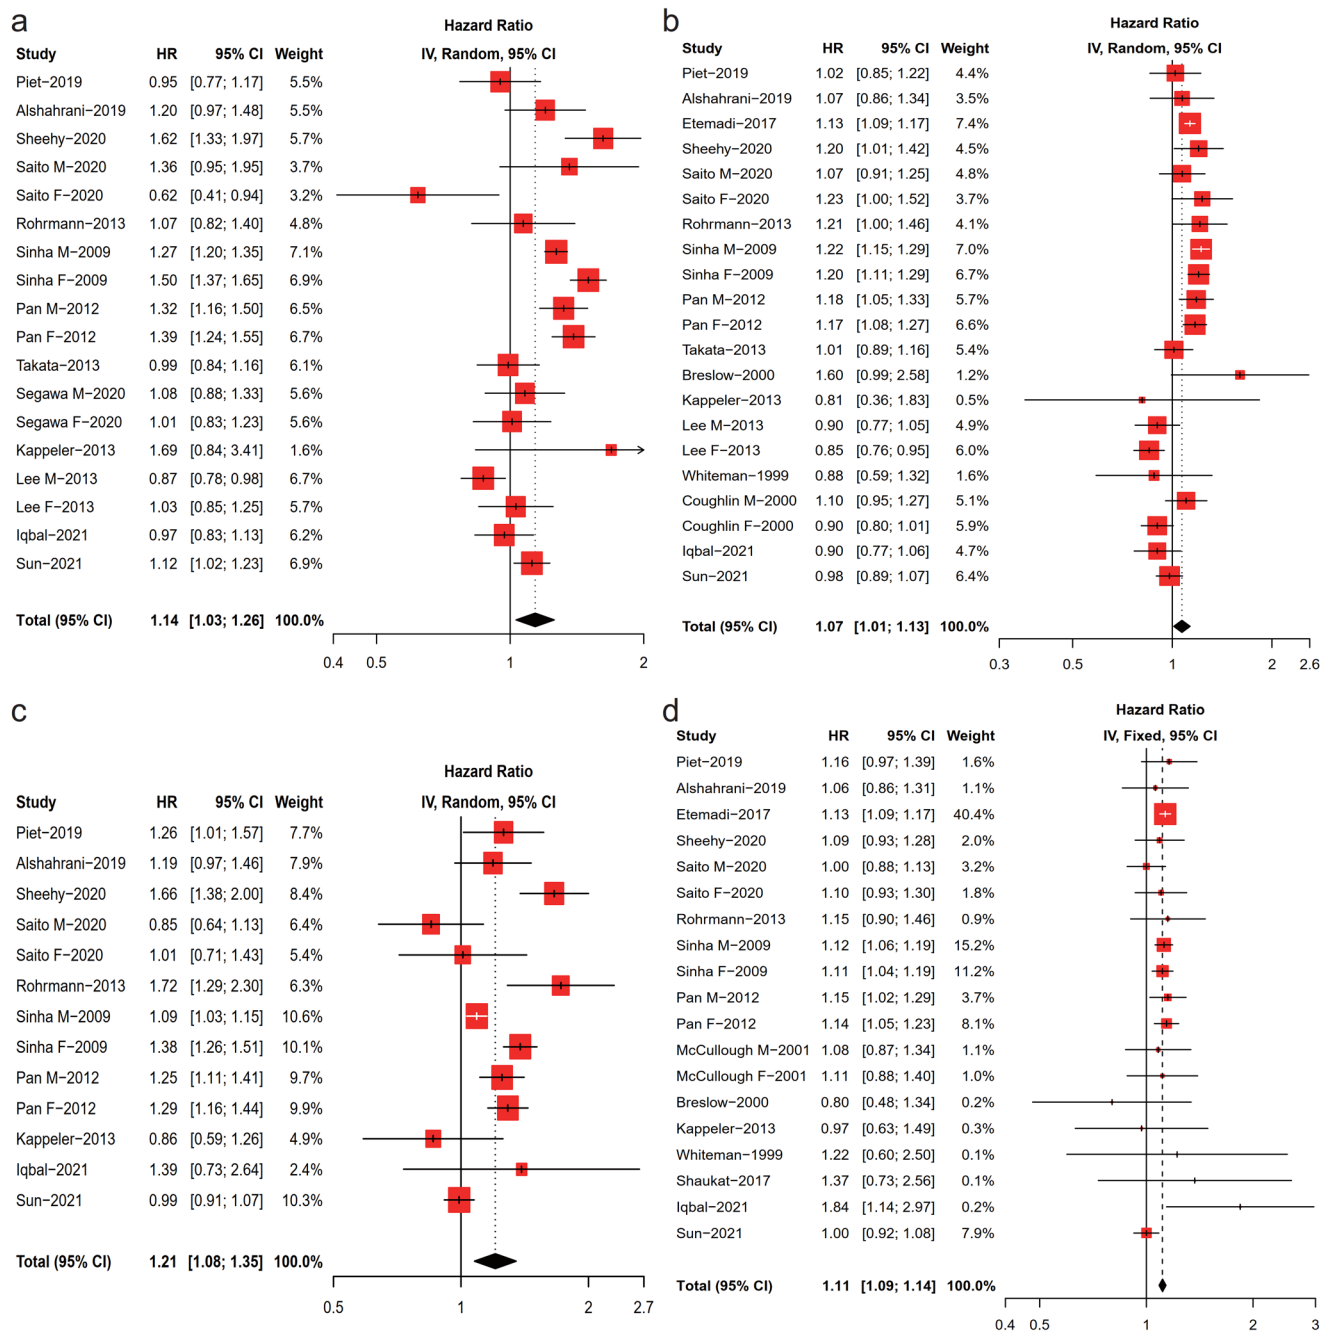

Figure S1. Forest plots of meta-analyses of red and processed meat intake and mortality risk. a) red meat intake and CVD mortality; b) red meat intake and cancer mortality; c) processed meat intake and CVD mortality; d) processed meat intake and cancer mortality.

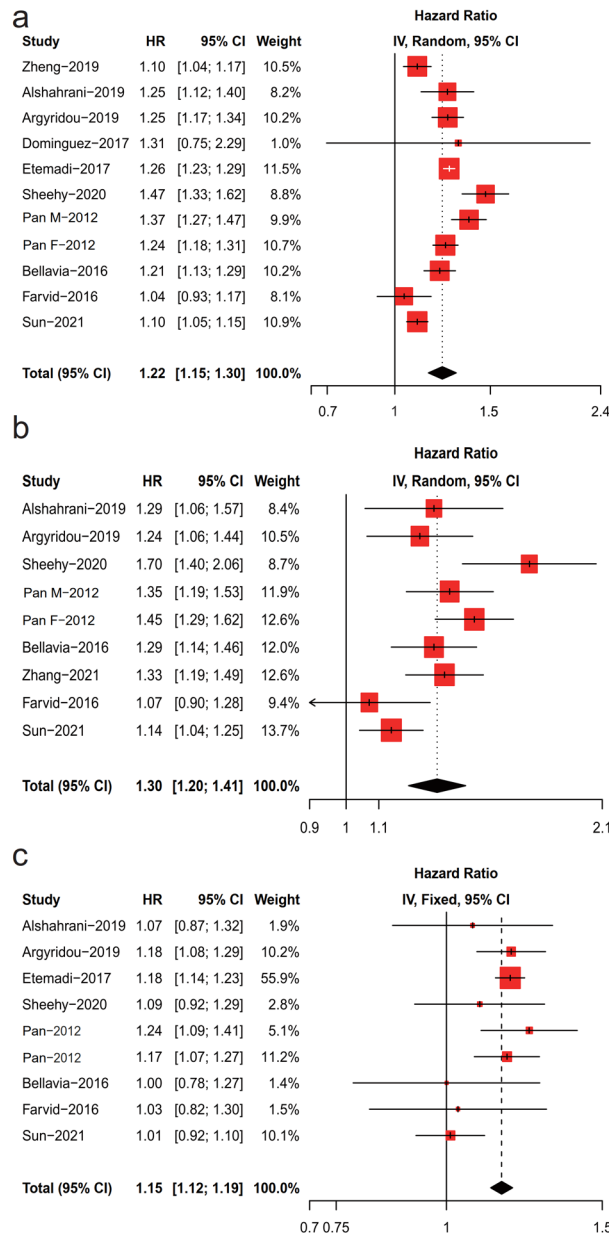

Figure S2. Forest plots of meta-analyses of mixed intake of red and processed meat and mortality risk. a) mixed intake of red and processed meat and all-cause mortality; b) mixed intake of red and processed meat and CVD mortality; c) mixed intake of red and processed meat and cancer mortality.

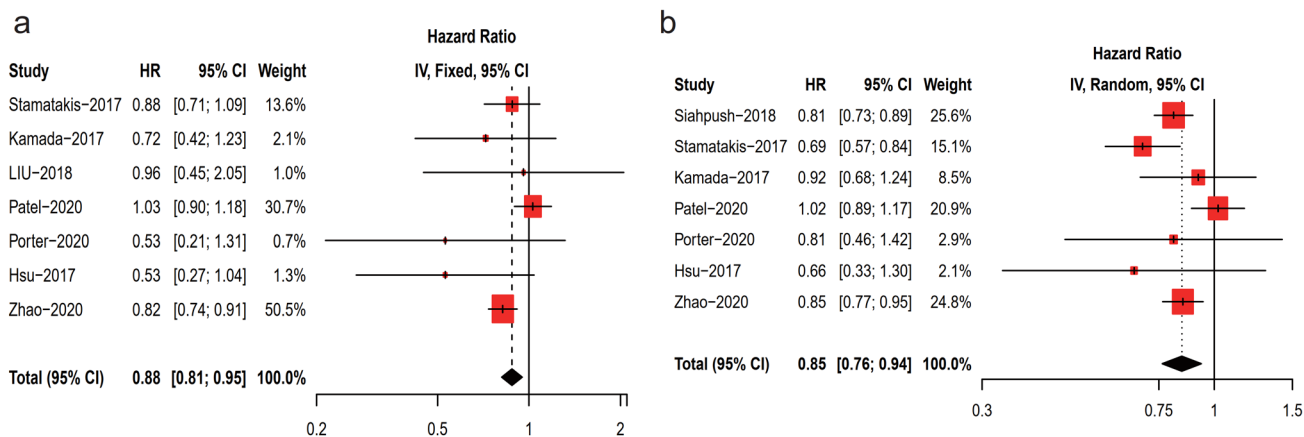

Figure S3. Forest plots of meta-analyses of muscle-strengthening activity (MSA) and mortality outcomes. a) MSA and CVD mortality; b) MSA and cancer mortality.



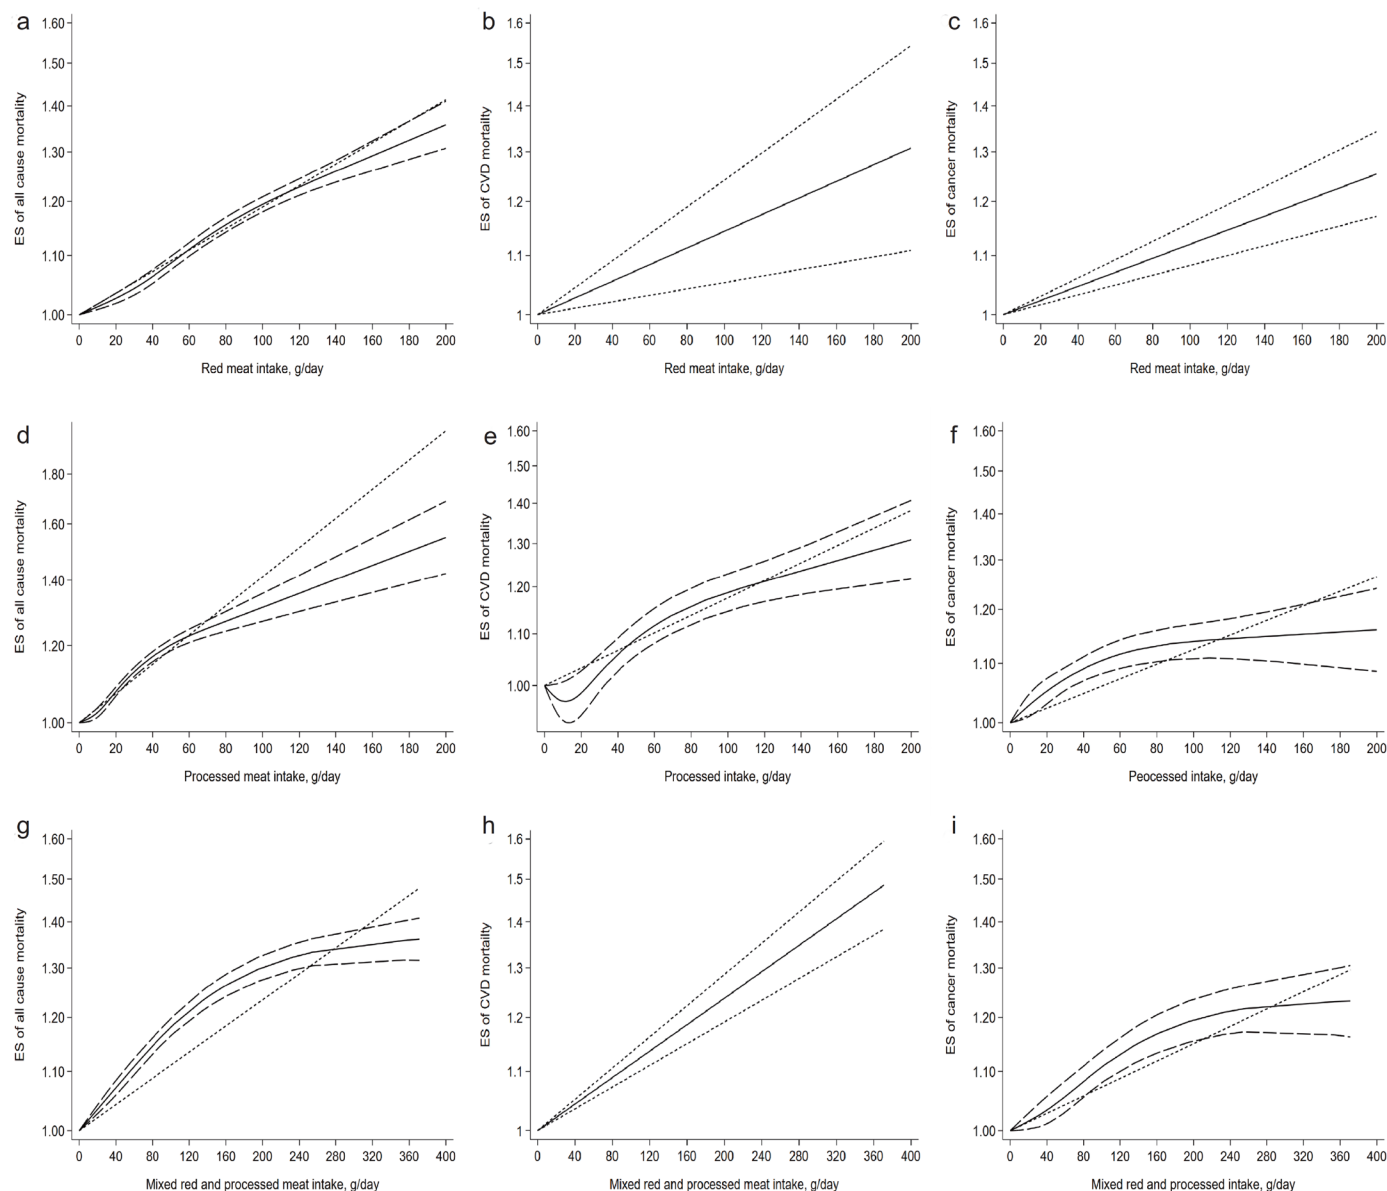

Figure S4: Linear and non-linear dose-response relationships between red and processed meat intake and mortality risk. a) red meat intake and all-cause mortality; b) red meat intake and CVD mortality; c) red meat intake and cancer mortality; d) processed meat intake and all-cause mortality; e) processed meat intake and CVD mortality; f) processed meat intake and cancer mortality; g) mixed meat intake and all-cause mortality; h) mixed meat intake and CVD mortality; i) mixed meat intake and cancer mortality.

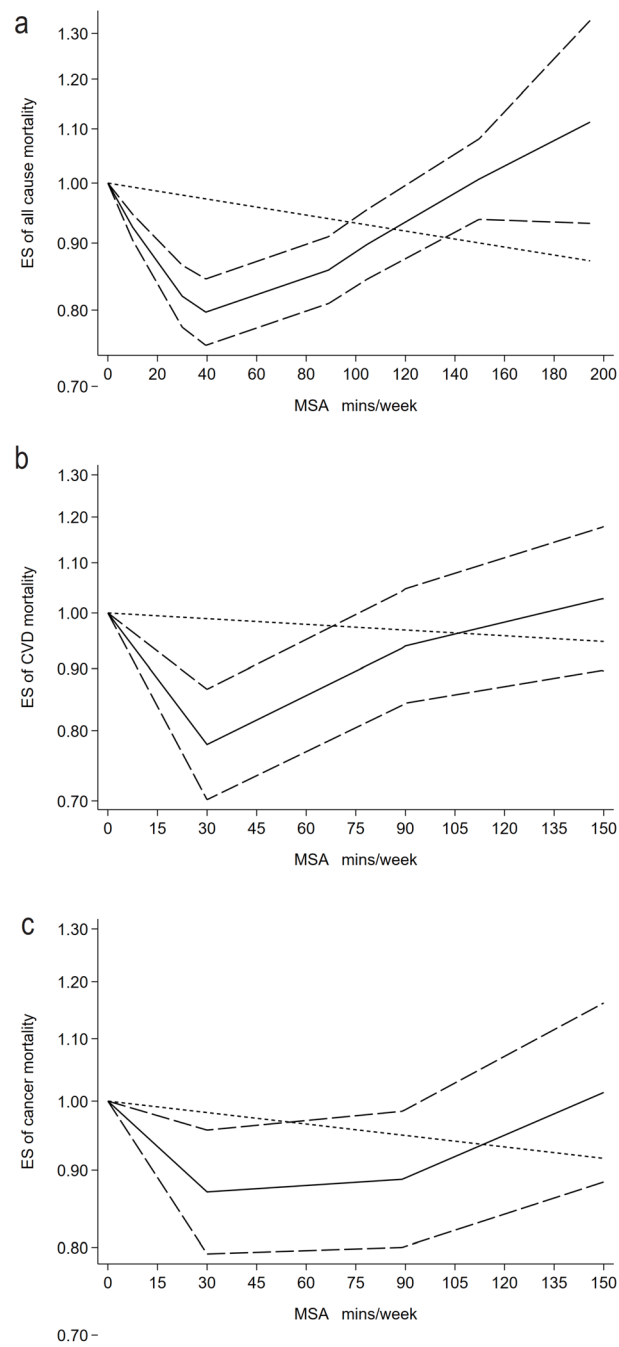

Figure S5. Non-linear dose-response relationships between MSA and mortality risk. a) MSA and all-cause mortality; b) MSA and CVD mortality; c) MSA and cancer mortality.

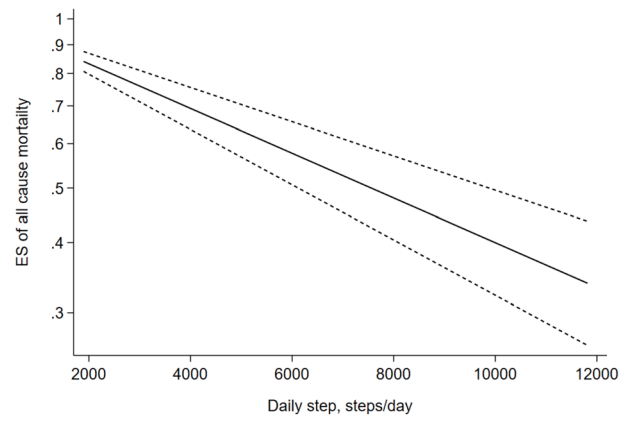

Figure S6. Linear dose-response relationships between daily steps all-cause mortality.

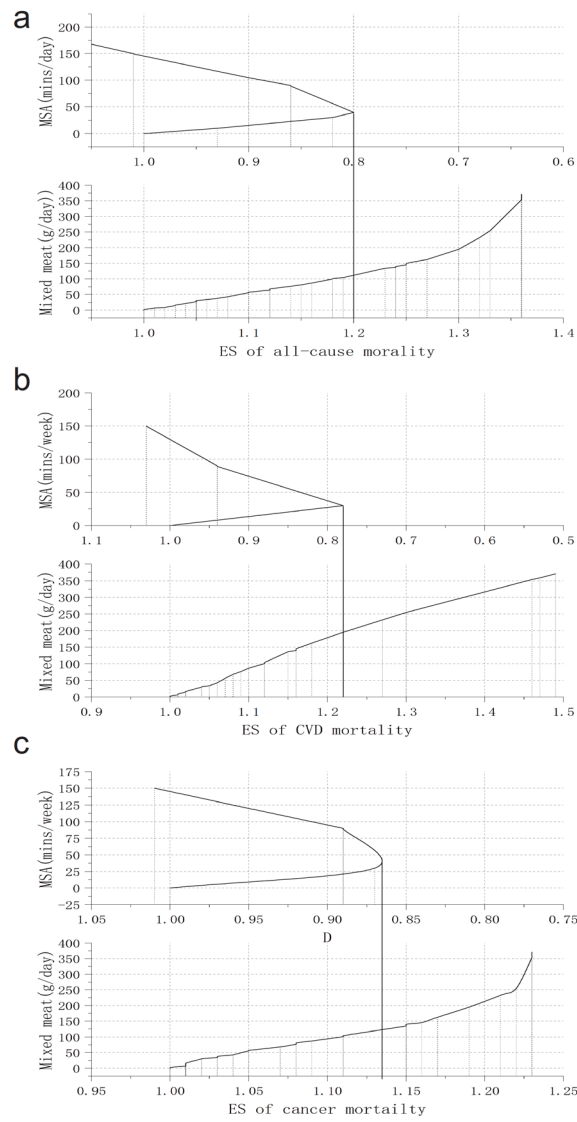

Figure S7. Balanced associations between mixed intake of red and processed meat and muscle-strengthening activity (MSA). a) mixed intake of red and processed meat, MSA and all-cause mortality; b) mixed intake of red and processed meat, MSA and CVD mortality; c) mixed intake of red and processed meat, MSA and cancer mortality.

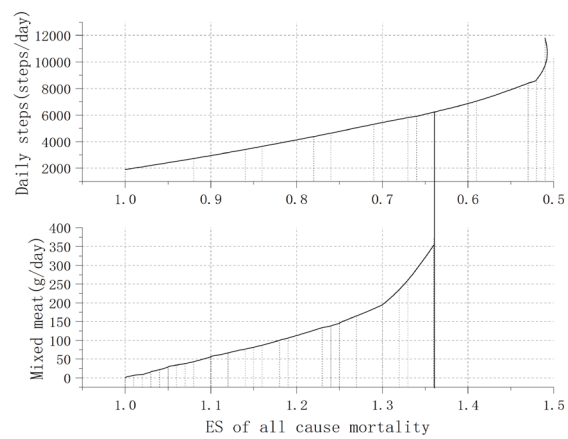

Figure S8. Balanced associations between mixed intake red and processed meat, daily steps and all-cause mortality.

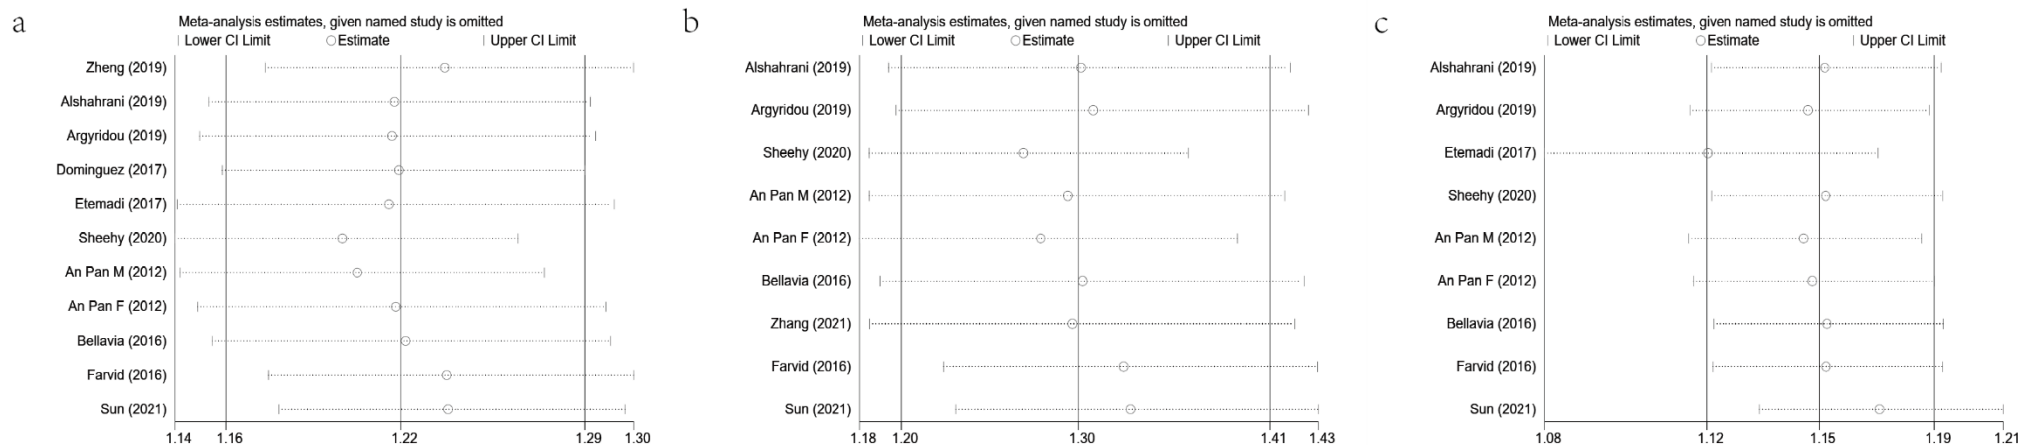

Figure S9. Sensitivity analysis of mixed red and processed intake and mortality outcomes.

a) mixed intake of red and processed meat and all-cause mortality; b) mixed intake of red and processed meat and CVD mortality; c) mixed intake of red and processed meat and cancer mortality.

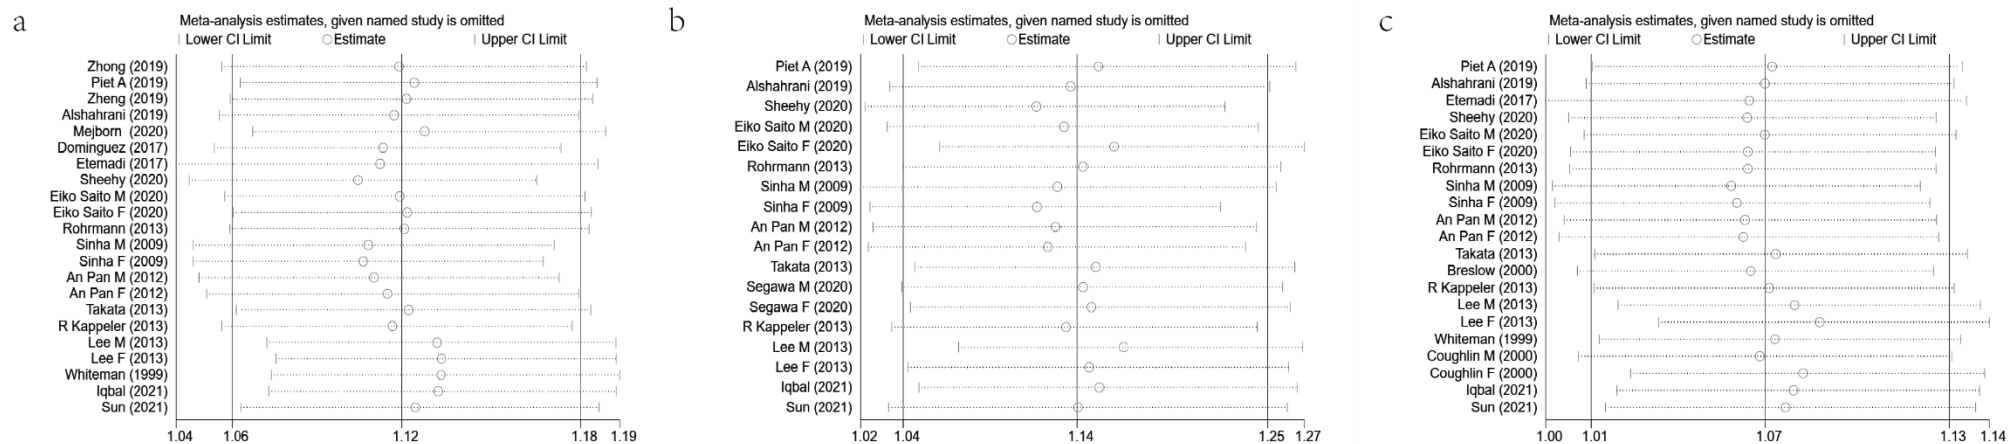

Figure S10. Sensitivity analysis of red meat intake and mortality outcomes.

a) intake of red meat and all-cause mortality; b) intake of red meat and CVD mortality; c) intake of red meat and cancer mortality.

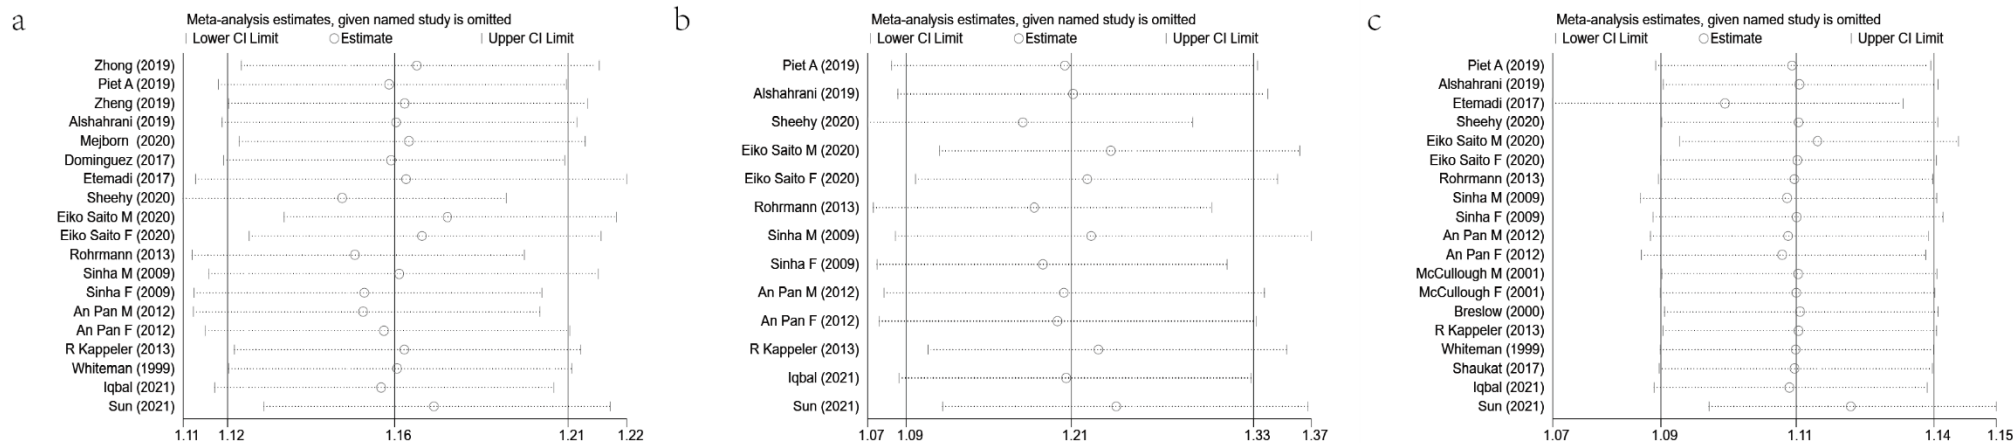

Figure S11. Sensitivity analysis of processed intake and mortality outcomes.

a) intake of processed meat and all-cause mortality; b) intake of processed meat and CVD mortality; c) intake of processed meat and cancer mortality.



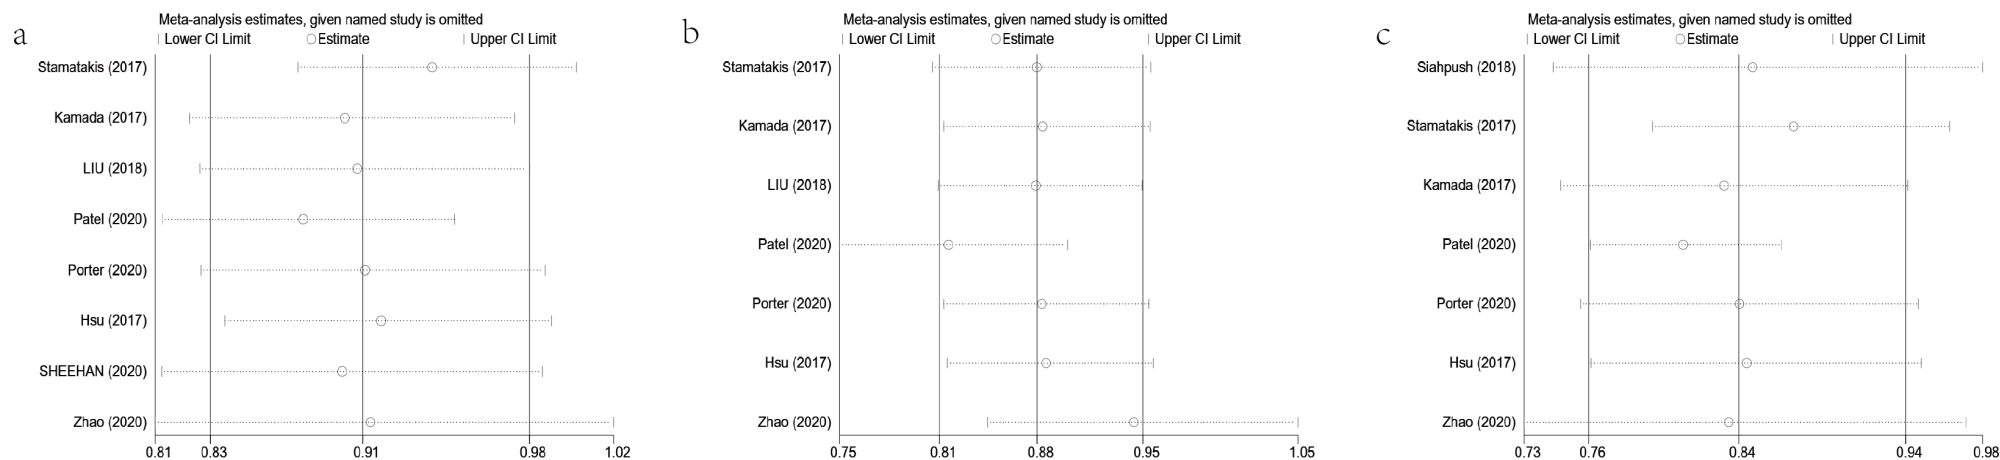

Figure S12. Sensitivity analysis of muscle-strengthening activity (MSA) and mortality outcomes.

a) MSA and all-cause mortality; b) MSA and processed meat and CVD mortality; c) MSA and cancer mortality.

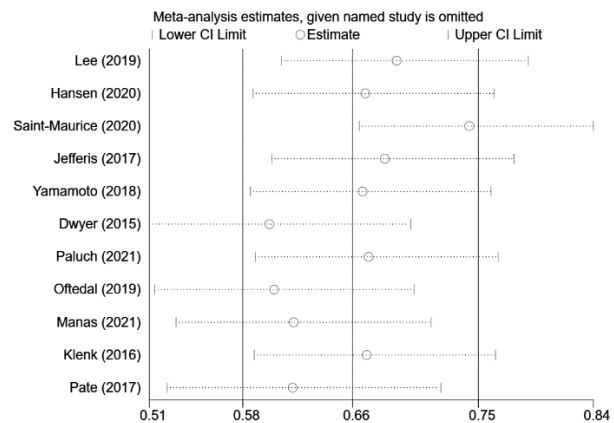

Figure S13. Sensitivity analysis of daily steps and all-cause mortality.

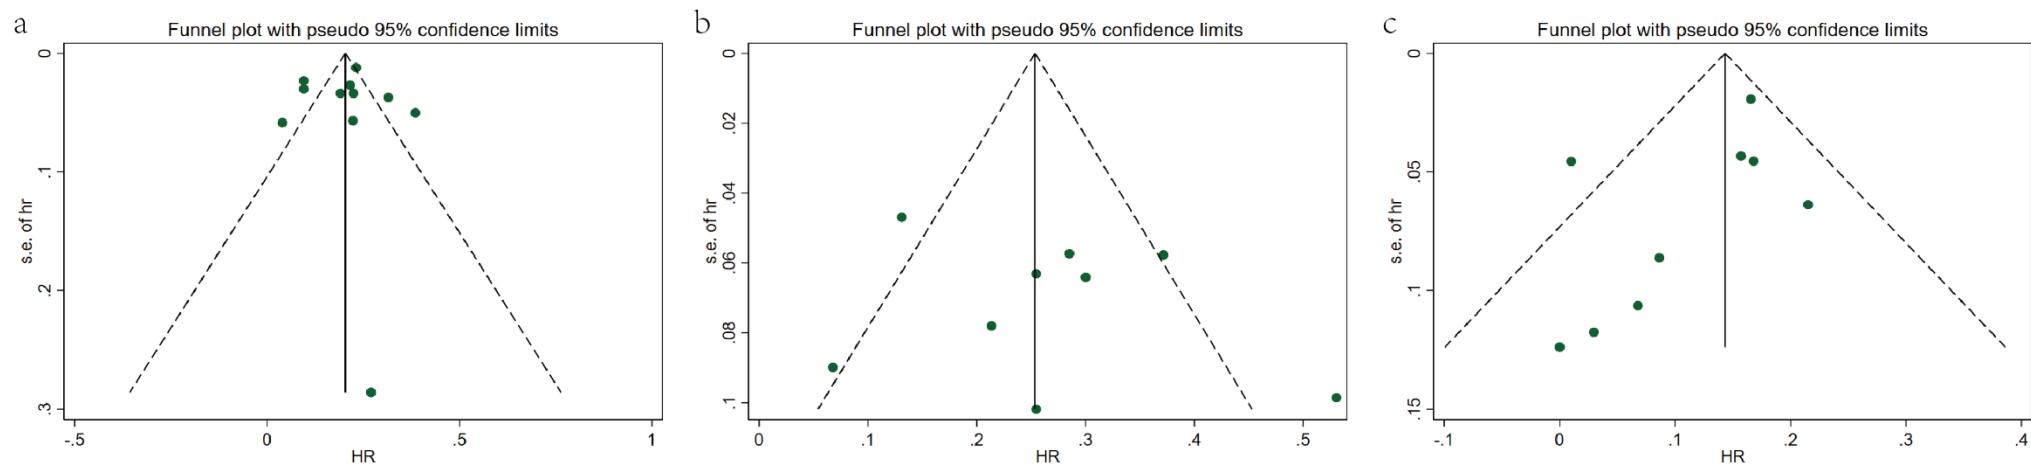

Figure S14. Funnel plot of included studies in the meta-analysis of the intake of mixed red and processed meat and mortality from all-cause, CVD, and cancer.

a) mixed intake of red and processed meat and all-cause mortality; b) mixed intake of red and processed meat and CVD mortality; c) mixed intake of red and processed meat and cancer mortality.

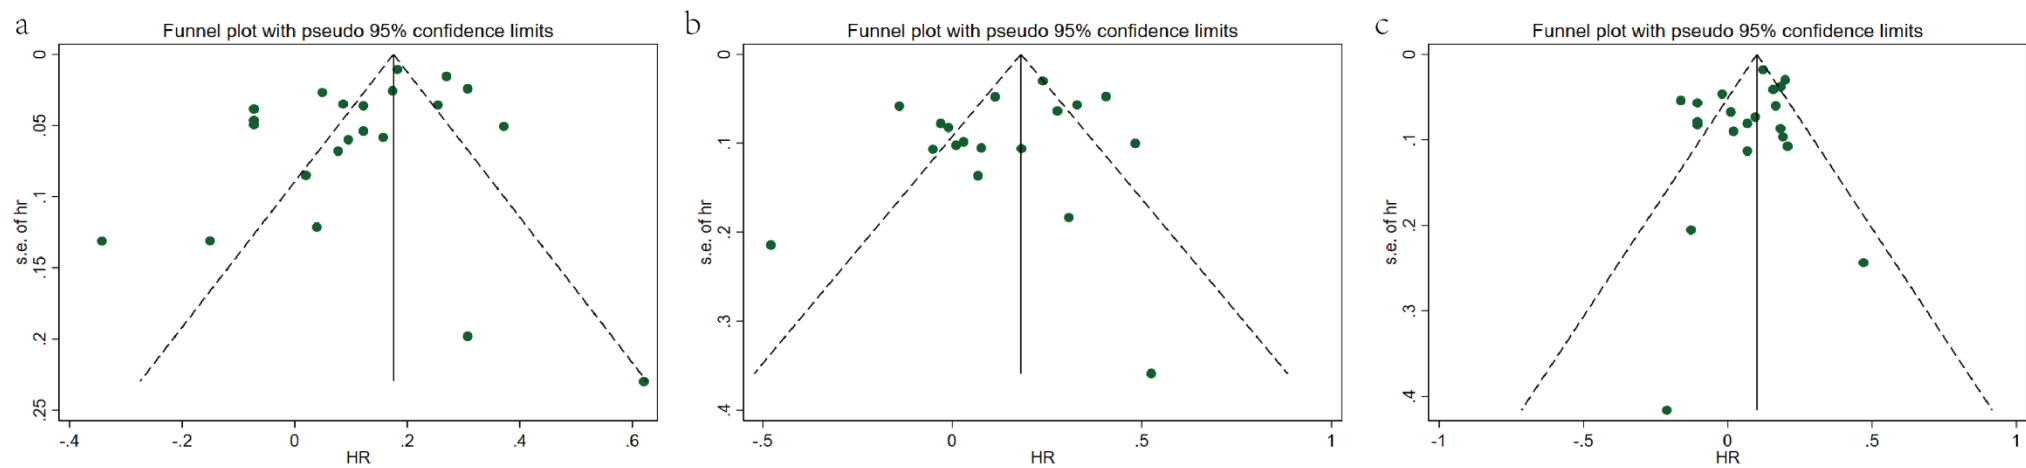

Figure S15. Funnel plot of included studies in the meta-analysis of the intake of red meat and mortality from all-cause, CVD, and cancer.

a) red meat intake and all-cause mortality; b) red meat intake and CVD mortality; c) red meat intake and cancer mortality.

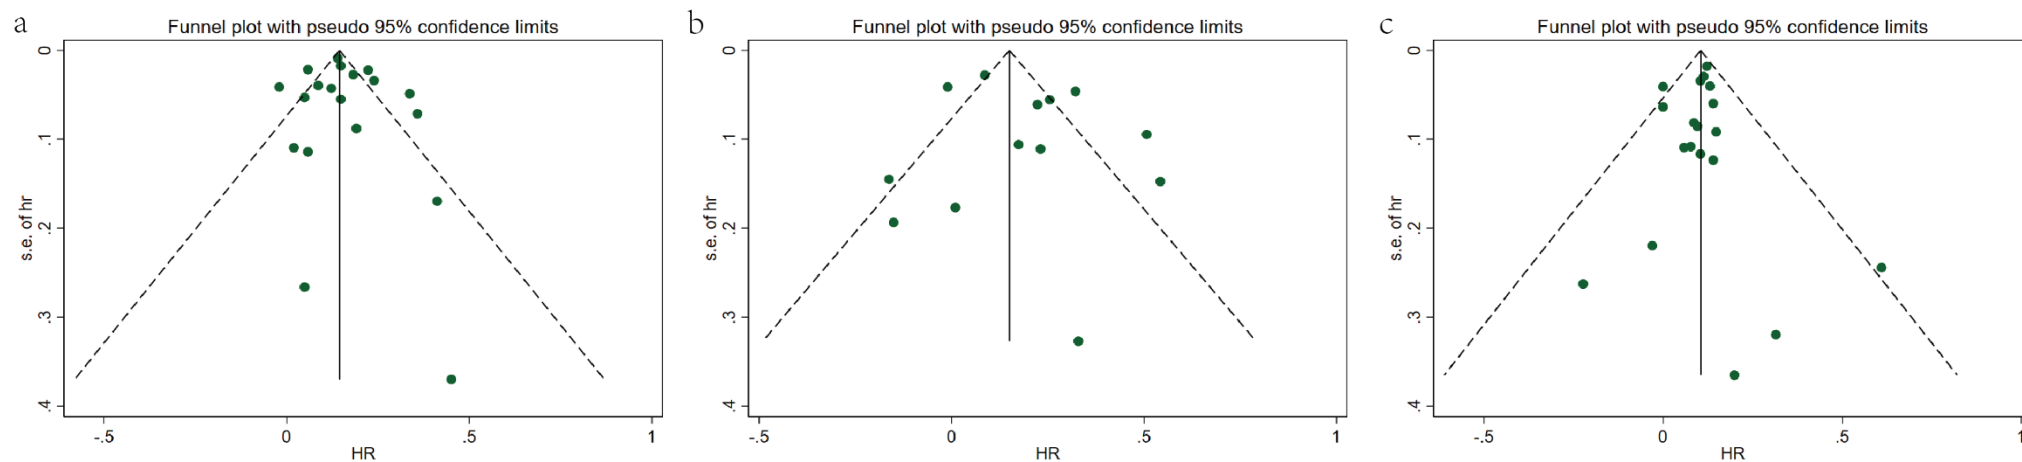

Figure S16. Funnel plot of included studies in the meta-analysis of the intake of processed meat and mortality from all-cause, CVD, and cancer.

a) processed meat intake and all-cause mortality; b) processed meat intake and CVD mortality; c) processed meat intake and cancer mortality.

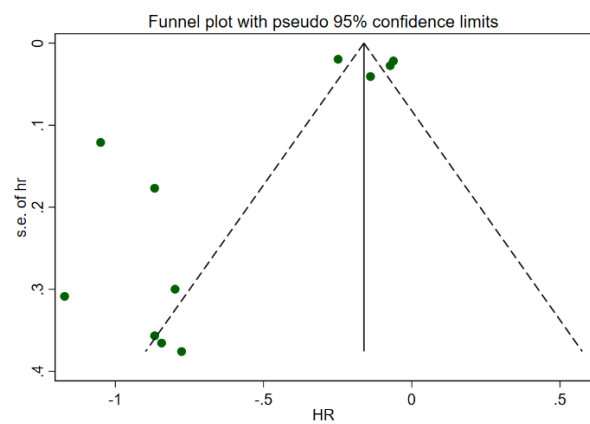

Figure S17. Funnel plot of included studies in the meta-analysis of daily steps and all-cause mortality.
